# Supplementary material for: Selenoprotein T Protects Endothelial Cells against Lipopolysaccharide-Induced Activation and Apoptosis
Source: MDPI journal article supplement (doi:10.3390/antiox10091427), 2021-09-07
Supplement: s1 [file s1]

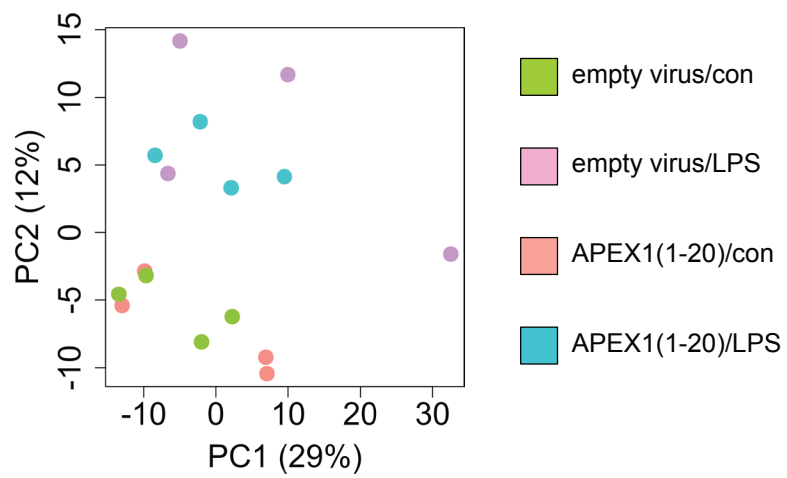

**Supplementary figure S1: Principal component analysis.** Endothelial cells were transduced with a lentiviral expression vector for APEX1(1-20) or an empty virus and treated with detoxified (con) or active LPS (LPS). and subjected to RNA deep sequencing.

**Supplementary table S1: Primer pairs used for endpoint PCR and semi-quantitative real-time PCR.**  
Shown are the sequences of the primers in 5'→3' direction and the expected amplification products.

| transcript   | primer             | sequence |                             | amplification product |
|--------------|--------------------|----------|-----------------------------|-----------------------|
| RPL32        | hmRPL32 Ex02 for1  | 5'-      | GTGAAGCCCAAGATCGTCAA -3'    | 257 bp                |
|              | hmRPL32 Ex03 rev1  | 5'-      | TTGTTGCACATCAGCAGCAC -3'    |                       |
| PXDN         | hPXDN Ex20/21 for1 | 5'-      | CGGAAAATACCCAGTGTTGGGAG -3' | 223 bp                |
|              | hPXDN Ex22 rev1    | 5'-      | TGGTGTTGTTGGCGTGAGATTC -3'  |                       |
| SELENOT      | hSELENOT Ex01 for  | 5'-      | GCGTGCCCAGCAAGAGATTA -3'    | 99bp                  |
|              | hSELENOT Ex02 rev1 | 5'-      | ACTCCTCAAACACCCGCCTA -3'    |                       |
| FLAG-SELENOT | FLAG for2          | 5'-      | CAAAGACGATGACGACAAGC -3'    | 206 bp                |
|              | hSELENOT Ex02 rev1 | 5'-      | ACTCCTCAAACACCCGCCTA -3'    |                       |

**Supplementary Table S2: Differential gene expression analysis for genes regulated by expression of APEX1(1-20).** DGE was calculated using the R package DESeq2 in samples of cells transduced with the lentivirus expressing APEX1(1-20) versus cells transduced with the empty virus both treated with detoxified LPS. The L2FC (Log 2-fold change) states the average difference in gene expression between the two cell populations. Positive L2FC values denote upregulation by APEX1(1-20) expression, negative values downregulation. Wald test from DESeq2 was used to calculate the significance of the change in the expression. The adjusted p-values take the number of tested genes into account, the threshold for the adjusted p-value was set to 0.05. APEX1(1-20)-myc represents the transcript originating from the APEX1(1-20) expression vector, which codes for a fusion between the APEX1 peptide and a myc epitope tag.

| gene name       | Ensembl gene ID | L2FC    | p-value  | adjusted p-value |
|-----------------|-----------------|---------|----------|------------------|
| APEX1(1-20)-myc | NA              | 9,861   | 3,73E-40 | 2,92E-36         |
| LRTOMT          | ENSG00000184154 | 0,653   | 5,85E-11 | 3,06E-07         |
| SRP9P1          | ENSG00000180581 | -26,509 | 5,11E-10 | 2,00E-06         |
| AL358472.7      | NA              | 21,631  | 2,86E-08 | 8,99E-05         |
| CR354443.1      | NA              | -23,191 | 6,74E-08 | 1,51E-04         |
| H3P6            | ENSG00000235655 | -22,915 | 6,69E-08 | 1,51E-04         |
| KCNJ15          | ENSG00000157551 | -0,848  | 1,05E-06 | 2,06E-03         |
| CAMSAP3         | ENSG00000076826 | 1,139   | 7,29E-06 | 1,21E-02         |
| GJA5            | ENSG00000265107 | 0,484   | 7,73E-06 | 1,21E-02         |
| GDF7            | ENSG00000143869 | 0,397   | 9,76E-06 | 1,39E-02         |
| CCL2            | ENSG00000108691 | 0,324   | 1,80E-05 | 2,35E-02         |
| HNRNPCP1        | ENSG00000258900 | 17,502  | 4,12E-05 | 4,97E-02         |

**Supplementary Table S3: Overrepresented GO terms in genes upregulated by LPS exclusively in cells not expressing APEX1(1-20).** Gene set enrichment analysis (GSEA) was applied to genes from the DGE analysis, which were significantly upregulated by LPS exclusively in cells transduced with the empty virus GSEA was performed using R package goseq with a threshold on the adjusted p-values of 0.05. numDEInCat: number of differentially expressed genes belonging to the respective GO term; numInCat: number of genes related to the GO term.

| GO ID      | GO term                                                                                                           | overrepresented p-value | adjusted p-value | numDEInCat | numInCat |
|------------|-------------------------------------------------------------------------------------------------------------------|-------------------------|------------------|------------|----------|
| GO:0005886 | plasma membrane                                                                                                   | 8,50E-08                | 8,19E-05         | 101        | 2946     |
| GO:0002479 | antigen processing and presentation of exogenous peptide antigen via MHC class I, TAP-dependent                   | 5,13E-06                | 2,95E-03         | 10         | 65       |
| GO:0050852 | T cell receptor signaling pathway                                                                                 | 8,51E-06                | 4,63E-03         | 13         | 134      |
| GO:0033209 | tumor necrosis factor-mediated signaling pathway                                                                  | 9,82E-06                | 5,18E-03         | 12         | 102      |
| GO:0019722 | calcium-mediated signaling                                                                                        | 1,05E-05                | 5,38E-03         | 8          | 49       |
| GO:0002250 | adaptive immune response                                                                                          | 1,11E-05                | 5,45E-03         | 11         | 92       |
| GO:0006959 | humoral immune response                                                                                           | 1,13E-05                | 5,45E-03         | 6          | 22       |
| GO:0045766 | positive regulation of angiogenesis                                                                               | 1,25E-05                | 5,86E-03         | 11         | 100      |
| GO:0019955 | cytokine binding                                                                                                  | 2,55E-05                | 1,16E-02         | 6          | 27       |
| GO:0002486 | antigen processing and presentation of endogenous peptide antigen via MHC class I via ER pathway, TAP-independent | 3,90E-05                | 1,61E-02         | 3          | 3        |
| GO:0046977 | TAP binding                                                                                                       | 3,90E-05                | 1,61E-02         | 3          | 3        |
| GO:0009395 | phospholipid catabolic process                                                                                    | 4,21E-05                | 1,69E-02         | 4          | 11       |
| GO:0005604 | basement membrane                                                                                                 | 4,36E-05                | 1,71E-02         | 8          | 71       |
| GO:0016020 | membrane                                                                                                          | 5,34E-05                | 2,00E-02         | 159        | 5600     |
| GO:0016032 | viral process                                                                                                     | 6,23E-05                | 2,29E-02         | 26         | 520      |
| GO:0071356 | cellular response to tumor necrosis factor                                                                        | 8,18E-05                | 2,87E-02         | 10         | 92       |
| GO:1990111 | spermatoproteasome complex                                                                                        | 8,70E-05                | 2,99E-02         | 3          | 4        |
| GO:0035455 | response to interferon-alpha                                                                                      | 9,63E-05                | 3,25E-02         | 4          | 10       |
| GO:0010466 | negative regulation of peptidase activity                                                                         | 1,07E-04                | 3,48E-02         | 7          | 46       |
| GO:0030414 | peptidase inhibitor activity                                                                                      | 1,11E-04                | 3,49E-02         | 7          | 46       |
| GO:0009617 | response to bacterium                                                                                             | 1,15E-04                | 3,49E-02         | 8          | 66       |
| GO:0010951 | negative regulation of endopeptidase activity                                                                     | 1,17E-04                | 3,49E-02         | 8          | 64       |
| GO:0042270 | protection from natural killer cell mediated cytotoxicity                                                         | 1,18E-04                | 3,49E-02         | 3          | 4        |
| GO:0001968 | fibronectin binding                                                                                               | 1,18E-04                | 3,49E-02         | 5          | 22       |
| GO:0004867 | serine-type endopeptidase inhibitor activity                                                                      | 1,40E-04                | 4,06E-02         | 6          | 37       |
| GO:0019882 | antigen processing and presentation                                                                               | 1,45E-04                | 4,15E-02         | 6          | 32       |

**Supplementary Table S4: Overrepresented GO terms in genes downregulated by LPS exclusively in cells expressing APEX1(1-20).** Gene set enrichment analysis (GSEA) was applied to genes from the DGE analysis, which were significantly downregulated by LPS exclusively in cells transduced with the lentivirus expressing APEX1(1-20). GSEA was performed using R package goseq with a threshold on the adjusted p-values of 0.05. numDEInCat: number of differentially expressed genes belonging to the respective GO term; numInCat: number of genes related to the GO term.

| GO ID      | GO term                                    | overrepresented p-value | adjusted p-value | numDEInCat | numInCat |
|------------|--------------------------------------------|-------------------------|------------------|------------|----------|
| GO:0008217 | regulation of blood pressure               | 4,11E-08                | 4,89E-04         | 7          | 38       |
| GO:0005615 | extracellular space                        | 7,26E-08                | 4,89E-04         | 26         | 853      |
| GO:0032355 | response to estradiol                      | 8,53E-08                | 4,89E-04         | 9          | 87       |
| GO:0005576 | extracellular region                       | 2,65E-07                | 1,14E-03         | 32         | 1306     |
| GO:0031994 | insulin-like growth factor I binding       | 2,85E-06                | 9,81E-03         | 4          | 12       |
| GO:0005887 | integral component of plasma membrane      | 5,11E-06                | 1,46E-02         | 22         | 839      |
| GO:0016324 | apical plasma membrane                     | 6,85E-06                | 1,56E-02         | 11         | 236      |
| GO:0009612 | response to mechanical stimulus            | 8,14E-06                | 1,56E-02         | 6          | 53       |
| GO:0048247 | lymphocyte chemotaxis                      | 8,17E-06                | 1,56E-02         | 4          | 13       |
| GO:0009986 | cell surface                               | 9,27E-06                | 1,59E-02         | 15         | 444      |
| GO:0031526 | brush border membrane                      | 1,58E-05                | 2,46E-02         | 5          | 36       |
| GO:0005113 | patched binding                            | 2,55E-05                | 3,37E-02         | 3          | 7        |
| GO:0071356 | cellular response to tumor necrosis factor | 2,55E-05                | 3,37E-02         | 7          | 93       |
| GO:0006874 | cellular calcium ion homeostasis           | 3,35E-05                | 4,12E-02         | 6          | 69       |
| GO:0002548 | monocyte chemotaxis                        | 4,05E-05                | 4,59E-02         | 4          | 20       |
| GO:0031995 | insulin-like growth factor II binding      | 4,27E-05                | 4,59E-02         | 3          | 8        |

**Supplementary Table S5: Differentially expressed genes upon LPS treatment of cells not expressing APEX1(1-20).** DGE calculated using the R package DESeq2 comparing samples of cells transduced with an empty virus and treated with active LPS versus treated with detoxified LPS. The L2FC (Log 2-fold change) states the average difference in gene expression between both treatments. Positive L2FC values denote upregulation by LPS treatment, negative values downregulation. Wald test from DESeq2 was used to calculate the significance of the change in the expression. The adjusted p-values take the number of tested genes into account, the threshold for the adjusted p-value was 0.05.

| gene name  | Ensembl gene ID | L2FC    | p-value   | adjusted p-value |
|------------|-----------------|---------|-----------|------------------|
| LAMC2      | ENSG00000058085 | 2,175   | 1,73E-211 | 2,50E-207        |
| EBI3       | ENSG00000105246 | 2,426   | 1,30E-60  | 9,40E-57         |
| CXCL6      | ENSG00000124875 | 1,813   | 1,84E-58  | 8,86E-55         |
| SOD2       | ENSG00000112096 | 1,027   | 2,11E-57  | 7,64E-54         |
| CCL2       | ENSG00000108691 | 1,201   | 6,20E-57  | 1,79E-53         |
| UBD        | ENSG00000226898 | 2,737   | 4,26E-56  | 1,03E-52         |
| CFB        | ENSG00000242335 | 1,832   | 3,80E-54  | 7,85E-51         |
| MMP10      | ENSG00000166670 | 1,176   | 2,23E-52  | 4,04E-49         |
| CTSS       | ENSG00000163131 | 1,296   | 2,29E-41  | 3,69E-38         |
| IL32       | ENSG00000008517 | 1,326   | 5,27E-36  | 7,63E-33         |
| CTSK       | ENSG00000143387 | 1,404   | 1,42E-35  | 1,87E-32         |
| POU2F2     | ENSG00000028277 | 1,233   | 3,86E-35  | 4,65E-32         |
| LTB        | ENSG00000223448 | 1,341   | 2,37E-34  | 2,64E-31         |
| S100A3     | ENSG00000188015 | 2,189   | 1,39E-33  | 1,44E-30         |
| IGFBP3     | ENSG00000146674 | -0,846  | 3,62E-31  | 3,49E-28         |
| PAPLN      | ENSG00000100767 | 1,617   | 2,35E-29  | 2,13E-26         |
| HLA-B      | ENSG00000206450 | 1,221   | 5,52E-25  | 4,70E-22         |
| ISG20      | ENSG00000172183 | 0,842   | 2,84E-24  | 2,29E-21         |
| CXCL1      | ENSG00000163739 | 1,075   | 6,17E-23  | 4,70E-20         |
| CNTNAP1    | ENSG00000108797 | 0,572   | 1,34E-22  | 9,73E-20         |
| CXCL3      | ENSG00000163734 | 0,929   | 2,43E-22  | 1,67E-19         |
| PLA2G4C    | ENSG00000105499 | 0,885   | 6,16E-22  | 4,05E-19         |
| IFI27      | ENSG00000275214 | 0,615   | 1,36E-21  | 8,58E-19         |
| MX1        | ENSG00000157601 | 1,110   | 1,53E-20  | 9,21E-18         |
| ANO9       | ENSG00000185101 | 4,656   | 2,14E-20  | 1,24E-17         |
| CXCL5      | ENSG00000163735 | 1,905   | 5,18E-20  | 2,88E-17         |
| ICAM1      | ENSG00000090339 | 0,723   | 1,24E-18  | 6,64E-16         |
| PSMB9      | ENSG00000243958 | 0,719   | 2,21E-16  | 1,14E-13         |
| IL4I1      | ENSG00000104951 | 0,729   | 1,24E-15  | 6,21E-13         |
| CXCL2      | ENSG00000081041 | 1,059   | 2,09E-14  | 1,01E-11         |
| SLC7A2     | ENSG00000003989 | 0,634   | 4,06E-14  | 1,89E-11         |
| THSD4      | ENSG00000187720 | 0,353   | 4,20E-14  | 1,90E-11         |
| MAMDC2     | ENSG00000278608 | 0,919   | 8,41E-14  | 3,69E-11         |
| IFI6       | ENSG00000126709 | 0,620   | 1,71E-13  | 7,28E-11         |
| NEURL1B    | ENSG00000214357 | -0,767  | 1,85E-13  | 7,63E-11         |
| TFPI2      | ENSG00000105825 | 0,766   | 2,66E-13  | 1,07E-10         |
| AC139530.2 | NA              | -30,000 | 9,87E-13  | 3,86E-10         |
| TNFRSF9    | ENSG00000049249 | 1,451   | 1,08E-12  | 4,10E-10         |
| LAMP3      | ENSG00000078081 | 0,608   | 4,93E-12  | 1,83E-09         |
| UBE2L6     | ENSG00000156587 | 0,403   | 1,16E-11  | 4,19E-09         |
| OAS2       | ENSG00000111335 | 1,100   | 2,43E-11  | 8,58E-09         |
| PSMB8      | ENSG00000230669 | 0,433   | 3,00E-11  | 1,03E-08         |
| CCL20      | ENSG00000115009 | 1,110   | 4,08E-11  | 1,37E-08         |
| CYB5R2     | ENSG00000166394 | 0,696   | 5,67E-11  | 1,86E-08         |
| GPSM2      | ENSG00000121957 | -0,652  | 7,28E-11  | 2,34E-08         |

|            |                 |         |          |          |
|------------|-----------------|---------|----------|----------|
| CTHRC1     | ENSG00000164932 | 0,593   | 1,00E-10 | 3,15E-08 |
| P2RX4      | ENSG00000135124 | 0,371   | 1,44E-10 | 4,40E-08 |
| TNC        | ENSG00000041982 | 3,090   | 1,46E-10 | 4,40E-08 |
| CXCL8      | ENSG00000169429 | 0,851   | 1,77E-10 | 5,21E-08 |
| STAP2      | ENSG00000178078 | 0,498   | 2,27E-10 | 6,56E-08 |
| CSF2       | ENSG00000164400 | 1,656   | 3,48E-10 | 9,87E-08 |
| ARHGDIG    | ENSG00000242173 | 0,656   | 4,24E-10 | 1,17E-07 |
| C2CD4A     | ENSG00000198535 | 0,895   | 4,27E-10 | 1,17E-07 |
| PRICKLE1   | ENSG00000139174 | -0,558  | 6,19E-10 | 1,66E-07 |
| CAV1       | ENSG00000105974 | -0,380  | 7,33E-10 | 1,93E-07 |
| CDKN3      | ENSG00000100526 | -0,614  | 8,83E-10 | 2,21E-07 |
| KIF20A     | ENSG00000112984 | -0,583  | 8,86E-10 | 2,21E-07 |
| METTL7A    | ENSG00000185432 | -0,478  | 8,64E-10 | 2,21E-07 |
| CYP51A1    | ENSG00000001630 | -0,352  | 1,73E-09 | 4,24E-07 |
| STARD10    | ENSG00000214530 | 0,569   | 1,99E-09 | 4,79E-07 |
| VWA1       | ENSG00000179403 | 0,476   | 3,39E-09 | 8,05E-07 |
| MX2        | ENSG00000183486 | 2,548   | 3,69E-09 | 8,60E-07 |
| APOL1      | ENSG00000100342 | 0,388   | 5,39E-09 | 1,24E-06 |
| TAPBP      | ENSG00000206281 | 0,477   | 5,53E-09 | 1,25E-06 |
| GP1BB      | ENSG00000203618 | -22,691 | 6,22E-09 | 1,38E-06 |
| DHRS3      | ENSG00000162496 | 0,429   | 6,82E-09 | 1,50E-06 |
| CEBPD      | ENSG00000221869 | 0,785   | 7,57E-09 | 1,63E-06 |
| PLA1A      | ENSG00000144837 | 1,472   | 7,81E-09 | 1,66E-06 |
| WASF3      | ENSG00000132970 | -0,313  | 9,19E-09 | 1,93E-06 |
| LYPD6      | ENSG00000187123 | 0,469   | 1,20E-08 | 2,47E-06 |
| CAPN2      | ENSG00000162909 | -0,289  | 1,47E-08 | 2,95E-06 |
| HLA-A      | ENSG00000227715 | 0,395   | 1,47E-08 | 2,95E-06 |
| HMGCS1     | ENSG00000112972 | -0,427  | 1,83E-08 | 3,63E-06 |
| BUB1       | ENSG00000169679 | -0,492  | 1,96E-08 | 3,83E-06 |
| SELENOM    | ENSG00000198832 | 0,545   | 1,98E-08 | 3,83E-06 |
| F2RL1      | ENSG00000164251 | 0,380   | 2,29E-08 | 4,36E-06 |
| BST1       | ENSG00000109743 | 0,394   | 2,56E-08 | 4,81E-06 |
| PCK2       | ENSG00000285241 | 0,426   | 2,61E-08 | 4,84E-06 |
| TNFSF18    | ENSG00000120337 | -0,583  | 3,14E-08 | 5,75E-06 |
| DENND2B    | ENSG00000166444 | 0,984   | 3,20E-08 | 5,79E-06 |
| AL451062.4 | NA              | -23,299 | 3,34E-08 | 5,98E-06 |
| UBA7       | ENSG00000182179 | 0,446   | 3,41E-08 | 6,02E-06 |
| ALOX5AP    | ENSG00000132965 | 1,587   | 3,68E-08 | 6,41E-06 |
| DLGAP5     | ENSG00000126787 | -0,621  | 4,30E-08 | 7,41E-06 |
| CRYBG1     | ENSG00000112297 | -0,333  | 4,95E-08 | 8,42E-06 |
| PRSS12     | ENSG00000164099 | 1,198   | 5,39E-08 | 9,07E-06 |
| LIPG       | ENSG00000101670 | 0,513   | 5,53E-08 | 9,19E-06 |
| SLC15A3    | ENSG00000110446 | 0,517   | 5,73E-08 | 9,43E-06 |
| ICOSLG     | ENSG00000160223 | 0,533   | 7,11E-08 | 1,16E-05 |
| OAS1       | ENSG00000089127 | 0,519   | 8,71E-08 | 1,40E-05 |
| CCNB2      | ENSG00000157456 | -0,480  | 9,09E-08 | 1,45E-05 |
| AL358472.7 | NA              | 20,830  | 9,30E-08 | 1,46E-05 |
| ACBD7      | ENSG00000176244 | -0,775  | 1,04E-07 | 1,62E-05 |
| MEST       | ENSG00000106484 | -0,435  | 1,21E-07 | 1,86E-05 |
| JAK3       | ENSG00000105639 | 0,743   | 1,22E-07 | 1,86E-05 |
| ALDH1A1    | ENSG00000165092 | -0,403  | 1,34E-07 | 2,02E-05 |
| CRTAC1     | ENSG00000095713 | 0,499   | 1,67E-07 | 2,49E-05 |
| OCIAD2     | ENSG00000145247 | 0,437   | 1,74E-07 | 2,56E-05 |

|             |                 |        |          |          |
|-------------|-----------------|--------|----------|----------|
| CD69        | ENSG00000110848 | 0,949  | 1,88E-07 | 2,75E-05 |
| MKI67       | ENSG00000148773 | -0,525 | 1,98E-07 | 2,87E-05 |
| FSTL3       | ENSG00000070404 | 0,444  | 2,37E-07 | 3,39E-05 |
| ADAMTS18    | ENSG00000140873 | -0,551 | 2,60E-07 | 3,59E-05 |
| CIT         | ENSG00000122966 | -0,468 | 2,53E-07 | 3,59E-05 |
| TMEM120A    | ENSG00000189077 | 0,427  | 2,59E-07 | 3,59E-05 |
| TNFRSF4     | ENSG00000186827 | 0,959  | 2,61E-07 | 3,59E-05 |
| DHH         | ENSG00000139549 | -0,464 | 3,68E-07 | 5,02E-05 |
| PRR11       | ENSG00000068489 | -0,326 | 3,87E-07 | 5,24E-05 |
| SERPINA3    | ENSG00000196136 | 2,440  | 4,12E-07 | 5,52E-05 |
| KIF12       | ENSG00000136883 | 0,697  | 6,16E-07 | 8,18E-05 |
| PLCG2       | ENSG00000197943 | 1,263  | 6,57E-07 | 8,65E-05 |
| PSME2       | ENSG00000284889 | 0,443  | 6,76E-07 | 8,81E-05 |
| BDKRB2      | ENSG00000168398 | 0,931  | 8,27E-07 | 1,07E-04 |
| ACSS1       | ENSG00000154930 | 0,279  | 8,67E-07 | 1,11E-04 |
| MAP2K6      | ENSG00000108984 | -0,373 | 8,88E-07 | 1,13E-04 |
| CCL15-CCL14 | ENSG00000282521 | -0,416 | 9,40E-07 | 1,18E-04 |
| MMP19       | ENSG00000123342 | 0,573  | 1,04E-06 | 1,29E-04 |
| ACE         | ENSG00000159640 | -0,620 | 1,11E-06 | 1,37E-04 |
| ZCCHC2      | ENSG00000141664 | -0,507 | 1,16E-06 | 1,42E-04 |
| PAQR7       | ENSG00000182749 | 0,277  | 1,18E-06 | 1,42E-04 |
| RASA4B      | ENSG00000170667 | 0,567  | 1,18E-06 | 1,42E-04 |
| CCNB1       | ENSG00000134057 | -0,496 | 1,20E-06 | 1,43E-04 |
| PLAAT4      | ENSG00000133321 | 0,728  | 1,30E-06 | 1,54E-04 |
| TAPBPL      | ENSG00000139192 | 0,812  | 1,37E-06 | 1,61E-04 |
| LYVE1       | ENSG00000133800 | -0,703 | 1,52E-06 | 1,78E-04 |
| APOD        | ENSG00000189058 | 0,469  | 1,76E-06 | 2,04E-04 |
| ZC3H12A     | ENSG00000163874 | 0,514  | 1,86E-06 | 2,14E-04 |
| CEP55       | ENSG00000138180 | -0,538 | 1,94E-06 | 2,21E-04 |
| ITGAV       | ENSG00000138448 | 0,523  | 2,09E-06 | 2,37E-04 |
| ARHGEF19    | ENSG00000142632 | 0,356  | 2,35E-06 | 2,64E-04 |
| MAP3K6      | ENSG00000142733 | 0,371  | 2,50E-06 | 2,76E-04 |
| SEMA3G      | ENSG00000010319 | 0,417  | 2,49E-06 | 2,76E-04 |
| POSTN       | ENSG00000133110 | -0,702 | 2,60E-06 | 2,85E-04 |
| GXYLT2      | ENSG00000172986 | 1,226  | 2,62E-06 | 2,85E-04 |
| AC087632.2  | NA              | -1,660 | 3,01E-06 | 3,23E-04 |
| ZDHHC13     | ENSG00000177054 | -0,297 | 3,01E-06 | 3,23E-04 |
| NUCKS1      | ENSG00000069275 | -0,368 | 3,07E-06 | 3,27E-04 |
| CKAP2       | ENSG00000136108 | -0,456 | 3,21E-06 | 3,39E-04 |
| ALDH1A2     | ENSG00000128918 | -0,356 | 3,38E-06 | 3,55E-04 |
| ZNF791      | ENSG00000173875 | -0,512 | 3,74E-06 | 3,90E-04 |
| AKAP12      | ENSG00000131016 | 0,272  | 4,09E-06 | 4,23E-04 |
| MTMR10      | ENSG00000277086 | -0,375 | 4,67E-06 | 4,79E-04 |
| AL109918.1  | NA              | -0,486 | 4,70E-06 | 4,80E-04 |
| CERS1       | ENSG00000223802 | 0,381  | 4,84E-06 | 4,90E-04 |
| C11orf96    | ENSG00000187479 | 0,453  | 5,27E-06 | 5,30E-04 |
| PLCG1       | ENSG00000124181 | 0,243  | 5,57E-06 | 5,56E-04 |
| MYRIP       | ENSG00000170011 | -0,347 | 5,87E-06 | 5,81E-04 |
| CXADR       | ENSG00000154639 | -0,411 | 6,06E-06 | 5,93E-04 |
| RASA4       | ENSG00000105808 | 0,440  | 6,03E-06 | 5,93E-04 |
| INCENP      | ENSG00000149503 | -0,443 | 6,36E-06 | 6,18E-04 |
| ELMOD1      | ENSG00000110675 | -0,476 | 6,88E-06 | 6,64E-04 |
| KNL1        | ENSG00000137812 | -0,713 | 7,35E-06 | 6,93E-04 |



|            |                 |        |          |          |
|------------|-----------------|--------|----------|----------|
| MSMP       | ENSG00000215183 | -0,370 | 7,33E-06 | 6,93E-04 |
| SAMD14     | ENSG00000167100 | 0,369  | 7,29E-06 | 6,93E-04 |
| SDC4       | ENSG00000124145 | 0,352  | 7,37E-06 | 6,93E-04 |
| MCFD2      | ENSG00000180398 | -0,277 | 7,55E-06 | 7,05E-04 |
| BST2       | ENSG00000130303 | 0,315  | 7,71E-06 | 7,15E-04 |
| MYZAP      | ENSG00000263155 | -0,413 | 8,20E-06 | 7,55E-04 |
| CENPF      | ENSG00000117724 | -0,557 | 8,47E-06 | 7,76E-04 |
| HMMR       | ENSG00000072571 | -0,747 | 8,70E-06 | 7,92E-04 |
| TSPAN13    | ENSG00000106537 | 0,390  | 9,00E-06 | 8,14E-04 |
| ASAP1      | ENSG00000153317 | -0,339 | 9,46E-06 | 8,50E-04 |
| PIGK       | ENSG00000142892 | -0,369 | 9,79E-06 | 8,75E-04 |
| PRCP       | ENSG00000137509 | 0,212  | 1,02E-05 | 9,10E-04 |
| PDCD6IP    | ENSG00000170248 | -0,363 | 1,11E-05 | 9,81E-04 |
| LRFN4      | ENSG00000173621 | 0,375  | 1,13E-05 | 9,94E-04 |
| ACAT2      | ENSG00000120437 | -0,299 | 1,15E-05 | 9,95E-04 |
| FXYD6      | ENSG00000137726 | 0,656  | 1,15E-05 | 9,95E-04 |
| R3HDM1     | ENSG00000048991 | -0,468 | 1,16E-05 | 1,00E-03 |
| TNFRSF14   | ENSG00000273936 | 0,388  | 1,20E-05 | 1,03E-03 |
| AC087721.2 | NA              | -0,375 | 1,31E-05 | 1,11E-03 |
| KIT        | ENSG00000157404 | 0,262  | 1,33E-05 | 1,13E-03 |
| IL27RA     | ENSG00000288185 | 0,362  | 1,36E-05 | 1,14E-03 |
| NEK2       | ENSG00000117650 | -0,489 | 1,35E-05 | 1,14E-03 |
| SYNJ2      | ENSG00000078269 | 0,160  | 1,36E-05 | 1,14E-03 |
| TMPO       | ENSG00000120802 | -0,320 | 1,40E-05 | 1,16E-03 |
| DEPDC1B    | ENSG00000035499 | -0,341 | 1,45E-05 | 1,19E-03 |
| SEMA7A     | ENSG00000288455 | 0,515  | 1,46E-05 | 1,19E-03 |
| IRF9       | ENSG00000285048 | 0,498  | 1,55E-05 | 1,26E-03 |
| MTMR11     | ENSG00000014914 | 0,364  | 1,57E-05 | 1,27E-03 |
| MGARP      | ENSG00000137463 | -0,476 | 1,62E-05 | 1,31E-03 |
| KCNJ15     | ENSG00000157551 | -0,746 | 1,74E-05 | 1,39E-03 |
| MGME1      | ENSG00000125871 | -0,250 | 1,79E-05 | 1,42E-03 |
| BORA       | ENSG00000136122 | -0,605 | 1,87E-05 | 1,48E-03 |
| CENPA      | ENSG00000115163 | -0,407 | 1,95E-05 | 1,53E-03 |
| ERMP1      | ENSG00000099219 | -0,267 | 1,95E-05 | 1,53E-03 |
| ITGB4      | ENSG00000132470 | -0,576 | 2,06E-05 | 1,61E-03 |
| CBR3       | ENSG00000159231 | 0,357  | 2,09E-05 | 1,62E-03 |
| PPL        | ENSG00000118898 | -0,801 | 2,30E-05 | 1,77E-03 |
| SPTLC1P1   | ENSG00000230397 | -0,705 | 2,49E-05 | 1,91E-03 |
| HSPE1-MOB4 | ENSG00000270757 | -0,483 | 2,51E-05 | 1,91E-03 |
| ASPM       | ENSG00000066279 | -0,784 | 2,55E-05 | 1,93E-03 |
| COBLL1     | ENSG00000082438 | -0,381 | 2,60E-05 | 1,95E-03 |
| ULBP2      | ENSG00000131015 | 0,338  | 2,59E-05 | 1,95E-03 |
| CX3CL1     | ENSG00000006210 | 0,553  | 2,63E-05 | 1,96E-03 |
| RAB14      | ENSG00000119396 | -0,247 | 2,72E-05 | 2,01E-03 |
| TOP2A      | ENSG00000131747 | -0,435 | 2,73E-05 | 2,01E-03 |
| AC091951.4 | NA              | 2,510  | 3,21E-05 | 2,35E-03 |
| DPP4       | ENSG00000197635 | -0,347 | 3,23E-05 | 2,35E-03 |
| LAMB3      | ENSG00000196878 | 0,446  | 3,26E-05 | 2,35E-03 |
| NFKBIZ     | ENSG00000144802 | 0,541  | 3,24E-05 | 2,35E-03 |
| NUF2       | ENSG00000143228 | -0,646 | 3,24E-05 | 2,35E-03 |
| ARL5A      | ENSG00000162980 | -0,701 | 3,35E-05 | 2,40E-03 |
| ABCA8      | ENSG00000141338 | -0,677 | 3,54E-05 | 2,53E-03 |
| DIAPH3     | ENSG00000139734 | -0,353 | 3,57E-05 | 2,53E-03 |

|            |                 |        |          |          |
|------------|-----------------|--------|----------|----------|
| FAHD2CP    | ENSG00000231584 | 0,381  | 3,69E-05 | 2,59E-03 |
| FP565260.3 | NA              | 0,391  | 3,68E-05 | 2,59E-03 |
| PSMB10     | ENSG00000205220 | 0,328  | 3,84E-05 | 2,68E-03 |
| TMEM121    | ENSG00000184986 | 0,381  | 3,87E-05 | 2,69E-03 |
| IFITM1     | ENSG00000185885 | 0,366  | 4,00E-05 | 2,77E-03 |
| SYNJ1      | ENSG00000159082 | -0,312 | 4,26E-05 | 2,94E-03 |
| EMCN       | ENSG00000164035 | -0,524 | 4,30E-05 | 2,95E-03 |
| IFIT1      | ENSG00000185745 | 0,820  | 4,33E-05 | 2,95E-03 |
| CCL14      | ENSG00000277236 | -0,431 | 4,57E-05 | 3,11E-03 |
| VAPA       | ENSG00000101558 | -0,205 | 4,75E-05 | 3,21E-03 |
| ACKR4      | ENSG00000129048 | -0,562 | 4,85E-05 | 3,26E-03 |
| HMGCR      | ENSG00000113161 | -0,321 | 4,93E-05 | 3,30E-03 |
| APAF1      | ENSG00000120868 | -0,294 | 5,05E-05 | 3,35E-03 |
| CLDN14     | ENSG00000159261 | 0,877  | 5,05E-05 | 3,35E-03 |
| FBXO32     | ENSG00000156804 | 0,355  | 5,18E-05 | 3,42E-03 |
| CSF3       | ENSG00000108342 | 1,066  | 5,63E-05 | 3,71E-03 |
| CENPE      | ENSG00000138778 | -0,750 | 5,78E-05 | 3,78E-03 |
| CPLANE2    | ENSG00000132881 | 0,390  | 5,88E-05 | 3,83E-03 |
| CAMTA2     | ENSG00000108509 | 0,290  | 6,00E-05 | 3,88E-03 |
| SLC22A31   | ENSG00000259803 | 0,695  | 6,00E-05 | 3,88E-03 |
| IFI35      | ENSG00000068079 | 0,380  | 6,14E-05 | 3,95E-03 |
| ZNF365     | ENSG00000138311 | 0,517  | 6,32E-05 | 4,05E-03 |
| PSME1      | ENSG00000284916 | 0,266  | 6,45E-05 | 4,11E-03 |
| GDF15      | ENSG00000130513 | 0,428  | 6,56E-05 | 4,16E-03 |
| HIBCH      | ENSG00000198130 | -0,436 | 6,70E-05 | 4,24E-03 |
| ACHE       | ENSG00000087085 | 0,801  | 6,78E-05 | 4,26E-03 |
| FTH1       | ENSG00000167996 | 0,268  | 6,87E-05 | 4,30E-03 |
| RPS6KL1    | ENSG00000198208 | 0,352  | 6,97E-05 | 4,35E-03 |
| PTK7       | ENSG00000112655 | 0,269  | 7,23E-05 | 4,49E-03 |
| TNFRSF6B   | ENSG00000243509 | 0,338  | 7,31E-05 | 4,52E-03 |
| C17orf107  | ENSG00000205710 | 0,459  | 7,81E-05 | 4,81E-03 |
| NECTIN3    | ENSG00000177707 | -0,470 | 8,03E-05 | 4,92E-03 |
| RNASE1     | ENSG00000129538 | -0,276 | 8,27E-05 | 5,05E-03 |
| AFF1       | ENSG00000172493 | -0,327 | 8,44E-05 | 5,05E-03 |
| GLRX       | ENSG00000173221 | -0,240 | 8,45E-05 | 5,05E-03 |
| GRASP      | NA              | 0,197  | 8,45E-05 | 5,05E-03 |
| LPCAT2     | ENSG00000087253 | -0,362 | 8,40E-05 | 5,05E-03 |
| NFKBIA     | ENSG00000100906 | 0,272  | 8,34E-05 | 5,05E-03 |
| INSIG1     | ENSG00000186480 | -0,278 | 9,05E-05 | 5,37E-03 |
| TMOD1      | ENSG00000136842 | 0,496  | 9,02E-05 | 5,37E-03 |
| B3GALT4    | ENSG00000235155 | 0,398  | 9,28E-05 | 5,43E-03 |
| CCNYL1     | ENSG00000163249 | -0,395 | 9,26E-05 | 5,43E-03 |
| MFAP2      | ENSG00000117122 | 0,276  | 9,30E-05 | 5,43E-03 |
| SYNGR3     | ENSG00000127561 | 0,367  | 9,20E-05 | 5,43E-03 |
| HTR2B      | ENSG00000135914 | -0,426 | 9,46E-05 | 5,50E-03 |
| ADAM12     | ENSG00000148848 | 1,044  | 9,52E-05 | 5,51E-03 |
| MEF2C      | ENSG00000081189 | -0,347 | 9,70E-05 | 5,59E-03 |
| SAPCD2     | ENSG00000186193 | -0,377 | 9,74E-05 | 5,60E-03 |
| MS4A6A     | ENSG00000110077 | 0,466  | 9,89E-05 | 5,66E-03 |
| PLTP       | ENSG00000100979 | 0,355  | 9,95E-05 | 5,67E-03 |
| CCNA2      | ENSG00000145386 | -0,400 | 1,01E-04 | 5,75E-03 |
| DPP3       | ENSG00000254986 | 0,281  | 1,02E-04 | 5,75E-03 |
| P2RY6      | ENSG00000171631 | 1,229  | 1,03E-04 | 5,79E-03 |

|           |                 |        |          |          |
|-----------|-----------------|--------|----------|----------|
| MAP6      | ENSG00000171533 | 0,992  | 1,05E-04 | 5,88E-03 |
| TCEAL7    | ENSG00000182916 | 0,328  | 1,05E-04 | 5,88E-03 |
| TGFBR3L   | ENSG00000260001 | 0,467  | 1,12E-04 | 6,18E-03 |
| TMEM132A  | ENSG00000006118 | 0,351  | 1,11E-04 | 6,18E-03 |
| WDFY3     | ENSG00000163625 | -0,381 | 1,12E-04 | 6,18E-03 |
| EPSTI1    | ENSG00000133106 | 0,802  | 1,13E-04 | 6,22E-03 |
| RND1      | ENSG00000172602 | 0,401  | 1,15E-04 | 6,28E-03 |
| HLA-H     | ENSG00000231904 | 0,356  | 1,15E-04 | 6,30E-03 |
| MSMO1     | ENSG00000052802 | -0,536 | 1,16E-04 | 6,33E-03 |
| RNMT      | ENSG00000101654 | -0,425 | 1,17E-04 | 6,33E-03 |
| MPHOSPH9  | ENSG00000051825 | -0,464 | 1,19E-04 | 6,44E-03 |
| RAB7B     | ENSG00000276600 | 1,191  | 1,20E-04 | 6,46E-03 |
| AMPH      | ENSG00000078053 | 0,488  | 1,23E-04 | 6,61E-03 |
| HAS2      | ENSG00000170961 | 1,050  | 1,30E-04 | 6,88E-03 |
| KIF4A     | ENSG00000090889 | -0,318 | 1,29E-04 | 6,88E-03 |
| SNX22     | ENSG00000157734 | 0,983  | 1,30E-04 | 6,88E-03 |
| AQP1      | ENSG00000240583 | -1,028 | 1,33E-04 | 6,98E-03 |
| H2AC6     | ENSG00000180573 | -0,697 | 1,33E-04 | 6,98E-03 |
| CASP1     | ENSG00000137752 | 0,488  | 1,34E-04 | 6,99E-03 |
| COTL1     | ENSG00000103187 | 0,280  | 1,35E-04 | 6,99E-03 |
| GSDMD     | ENSG00000278718 | 0,274  | 1,35E-04 | 6,99E-03 |
| KIF14     | ENSG00000118193 | -0,564 | 1,35E-04 | 6,99E-03 |
| QTRT2     | ENSG00000151576 | -0,279 | 1,34E-04 | 6,99E-03 |
| EFCAB14   | ENSG00000159658 | -0,243 | 1,40E-04 | 7,20E-03 |
| IER3      | ENSG00000235030 | 0,270  | 1,40E-04 | 7,20E-03 |
| RASD1     | ENSG00000108551 | 0,316  | 1,49E-04 | 7,60E-03 |
| AOX1      | ENSG00000138356 | 0,614  | 1,55E-04 | 7,85E-03 |
| FRY       | ENSG00000073910 | -0,171 | 1,55E-04 | 7,85E-03 |
| NBPF10    | ENSG00000271425 | -0,326 | 1,55E-04 | 7,85E-03 |
| STEAP1    | ENSG00000164647 | -0,346 | 1,56E-04 | 7,86E-03 |
| SULT1B1   | ENSG00000173597 | -0,498 | 1,58E-04 | 7,96E-03 |
| OIP5      | ENSG00000104147 | -0,352 | 1,61E-04 | 8,05E-03 |
| ANKH      | ENSG00000154122 | 0,290  | 1,63E-04 | 8,12E-03 |
| TMEM54    | ENSG00000121900 | 0,266  | 1,64E-04 | 8,15E-03 |
| SLC1A4    | ENSG00000115902 | 0,234  | 1,68E-04 | 8,33E-03 |
| IL11      | ENSG00000095752 | 0,997  | 1,69E-04 | 8,34E-03 |
| CGNL1     | ENSG00000128849 | -0,198 | 1,73E-04 | 8,48E-03 |
| NRG1      | ENSG00000157168 | -0,397 | 1,73E-04 | 8,48E-03 |
| RBBP9     | ENSG00000089050 | -0,332 | 1,74E-04 | 8,48E-03 |
| CKS2      | ENSG00000123975 | -0,336 | 1,83E-04 | 8,89E-03 |
| HLA-C     | ENSG00000206435 | 0,313  | 1,83E-04 | 8,89E-03 |
| TNIP3     | ENSG00000050730 | 1,038  | 1,84E-04 | 8,90E-03 |
| ADAM32    | ENSG00000275594 | -1,239 | 1,85E-04 | 8,91E-03 |
| MYO5A     | ENSG00000197535 | -0,276 | 1,85E-04 | 8,91E-03 |
| ACER3     | ENSG00000078124 | -0,213 | 1,97E-04 | 9,46E-03 |
| RELB      | ENSG00000104856 | 0,353  | 2,00E-04 | 9,55E-03 |
| GBP4      | ENSG00000162654 | 0,310  | 2,02E-04 | 9,61E-03 |
| RAB11FIP2 | ENSG00000107560 | -0,544 | 2,02E-04 | 9,61E-03 |
| SURF1     | ENSG00000280627 | 0,234  | 2,04E-04 | 9,64E-03 |
| MYH10     | ENSG00000133026 | -0,217 | 2,09E-04 | 9,83E-03 |
| PIMREG    | ENSG00000129195 | -0,446 | 2,09E-04 | 9,83E-03 |
| IL1A      | ENSG00000115008 | 0,507  | 2,18E-04 | 1,02E-02 |
| GMPPA     | ENSG00000144591 | 0,312  | 2,20E-04 | 1,03E-02 |

|            |                 |        |          |          |
|------------|-----------------|--------|----------|----------|
| ARL6IP1    | ENSG00000170540 | -0,280 | 2,22E-04 | 1,03E-02 |
| CNN3       | ENSG00000117519 | -0,234 | 2,24E-04 | 1,04E-02 |
| GALNT18    | ENSG00000110328 | 0,494  | 2,25E-04 | 1,04E-02 |
| FNBP1      | ENSG00000187239 | -0,269 | 2,28E-04 | 1,05E-02 |
| PARP10     | ENSG00000178685 | 0,319  | 2,28E-04 | 1,05E-02 |
| MLIP       | ENSG00000146147 | -0,301 | 2,45E-04 | 1,12E-02 |
| TM4SF18    | ENSG00000163762 | -0,366 | 2,45E-04 | 1,12E-02 |
| UBR4       | ENSG00000127481 | 0,376  | 2,47E-04 | 1,12E-02 |
| RMDN2      | ENSG00000115841 | -0,550 | 2,48E-04 | 1,13E-02 |
| HOXB9      | ENSG00000170689 | 0,395  | 2,52E-04 | 1,14E-02 |
| ARSA       | ENSG00000100299 | 0,292  | 2,55E-04 | 1,15E-02 |
| SOCS3      | ENSG00000184557 | 0,302  | 2,55E-04 | 1,15E-02 |
| FBLN5      | ENSG00000140092 | 0,404  | 2,58E-04 | 1,15E-02 |
| TSPAN5     | ENSG00000168785 | -0,195 | 2,58E-04 | 1,15E-02 |
| RSAD1      | ENSG00000136444 | 0,197  | 2,64E-04 | 1,18E-02 |
| ARHGAP11A  | ENSG00000275568 | -0,412 | 2,65E-04 | 1,18E-02 |
| ATP5F1D    | ENSG00000099624 | 0,341  | 2,66E-04 | 1,18E-02 |
| NSD2       | ENSG00000109685 | -0,239 | 2,68E-04 | 1,18E-02 |
| ISG15      | ENSG00000187608 | 0,345  | 2,81E-04 | 1,23E-02 |
| PBK        | ENSG00000168078 | -0,449 | 2,82E-04 | 1,23E-02 |
| LATS2      | ENSG00000150457 | -0,211 | 2,83E-04 | 1,24E-02 |
| AGRN       | ENSG00000188157 | 0,368  | 2,93E-04 | 1,28E-02 |
| TSSC4      | ENSG00000184281 | 0,419  | 2,95E-04 | 1,28E-02 |
| PMM1       | ENSG00000100417 | 0,341  | 3,00E-04 | 1,30E-02 |
| H2AC11     | ENSG00000196787 | -0,650 | 3,06E-04 | 1,32E-02 |
| EML2       | ENSG00000125746 | 0,311  | 3,14E-04 | 1,35E-02 |
| PCDH1      | ENSG00000156453 | 0,269  | 3,14E-04 | 1,35E-02 |
| NCKAP5     | ENSG00000176771 | 0,847  | 3,16E-04 | 1,35E-02 |
| TSPAN11    | ENSG00000110900 | -0,360 | 3,21E-04 | 1,37E-02 |
| CEP70      | ENSG00000114107 | -0,520 | 3,27E-04 | 1,39E-02 |
| CKAP5      | ENSG00000175216 | -0,220 | 3,32E-04 | 1,40E-02 |
| HSPB8      | ENSG00000152137 | 0,347  | 3,31E-04 | 1,40E-02 |
| AHNAK      | ENSG00000124942 | -0,388 | 3,34E-04 | 1,41E-02 |
| CCM2L      | ENSG00000101331 | -0,325 | 3,38E-04 | 1,42E-02 |
| DUSP4      | ENSG00000120875 | -0,269 | 3,41E-04 | 1,43E-02 |
| SULT1E1    | ENSG00000109193 | -0,482 | 3,41E-04 | 1,43E-02 |
| TCIRG1     | ENSG00000110719 | 0,271  | 3,43E-04 | 1,43E-02 |
| FXD2       | ENSG00000137731 | 0,734  | 3,45E-04 | 1,43E-02 |
| UBN2       | ENSG00000157741 | -0,561 | 3,47E-04 | 1,44E-02 |
| SPAG5      | ENSG00000076382 | -0,278 | 3,49E-04 | 1,44E-02 |
| THBS2      | ENSG00000186340 | 0,836  | 3,48E-04 | 1,44E-02 |
| ZNF800     | ENSG00000048405 | -0,353 | 3,52E-04 | 1,45E-02 |
| SGO2       | ENSG00000163535 | -0,656 | 3,64E-04 | 1,49E-02 |
| GFPT2      | ENSG00000131459 | 0,367  | 3,69E-04 | 1,51E-02 |
| APLN       | ENSG00000171388 | -0,407 | 3,81E-04 | 1,55E-02 |
| ARHGAP11B  | ENSG00000274734 | -0,429 | 3,86E-04 | 1,57E-02 |
| JUNB       | ENSG00000171223 | 0,259  | 3,87E-04 | 1,57E-02 |
| BPGM       | ENSG00000172331 | 0,259  | 3,89E-04 | 1,57E-02 |
| CDH15      | ENSG00000129910 | 0,509  | 3,90E-04 | 1,57E-02 |
| MTMR7      | ENSG00000003987 | 0,867  | 3,93E-04 | 1,58E-02 |
| ST6GALNAC2 | ENSG00000070731 | 0,756  | 3,98E-04 | 1,60E-02 |
| AC241640.1 | NA              | -1,539 | 4,06E-04 | 1,62E-02 |
| SFRP1      | ENSG00000104332 | -0,311 | 4,07E-04 | 1,62E-02 |

|            |                 |        |          |          |
|------------|-----------------|--------|----------|----------|
| LIG1       | ENSG00000105486 | 0,274  | 4,10E-04 | 1,63E-02 |
| SLC7A7     | ENSG00000155465 | 0,298  | 4,23E-04 | 1,68E-02 |
| CXCR4      | ENSG00000121966 | 0,237  | 4,25E-04 | 1,68E-02 |
| GBGT1      | ENSG00000148288 | 0,343  | 4,36E-04 | 1,72E-02 |
| SESN3      | ENSG00000149212 | -0,641 | 4,37E-04 | 1,72E-02 |
| MAPK1      | ENSG00000100030 | -0,294 | 4,38E-04 | 1,72E-02 |
| AC079594.2 | NA              | -0,631 | 4,42E-04 | 1,73E-02 |
| FMNL1      | ENSG00000184922 | 0,395  | 4,45E-04 | 1,74E-02 |
| HIVEP1     | ENSG00000095951 | -0,366 | 4,48E-04 | 1,74E-02 |
| PLEKHN1    | ENSG00000187583 | 0,492  | 4,49E-04 | 1,74E-02 |
| RBL2       | ENSG00000103479 | -0,287 | 4,48E-04 | 1,74E-02 |
| PTGS2      | ENSG00000073756 | 0,553  | 4,55E-04 | 1,76E-02 |
| WNK3       | ENSG00000196632 | -0,654 | 4,59E-04 | 1,77E-02 |
| NMNAT2     | ENSG00000157064 | 0,987  | 4,62E-04 | 1,77E-02 |
| TMSB15A    | ENSG00000158164 | -0,521 | 4,64E-04 | 1,77E-02 |
| WASF1      | ENSG00000112290 | -0,307 | 4,63E-04 | 1,77E-02 |
| PTGES3L    | ENSG00000267060 | 1,020  | 4,69E-04 | 1,79E-02 |
| GMFG       | ENSG00000130755 | 0,214  | 4,74E-04 | 1,80E-02 |
| HP1BP3     | ENSG00000127483 | -0,314 | 4,79E-04 | 1,81E-02 |
| SLC35C2    | ENSG00000080189 | 0,269  | 4,88E-04 | 1,84E-02 |
| SLC27A3    | ENSG00000263163 | 0,380  | 4,93E-04 | 1,86E-02 |
| CFAP69     | ENSG00000105792 | -0,585 | 4,96E-04 | 1,86E-02 |
| ZBTB42     | ENSG00000179627 | 0,284  | 4,98E-04 | 1,87E-02 |
| CPAMD8     | ENSG00000160111 | 0,499  | 5,08E-04 | 1,88E-02 |
| MAP1LC3A   | ENSG00000101460 | 0,328  | 5,06E-04 | 1,88E-02 |
| MT1L       | ENSG00000260549 | 0,355  | 5,05E-04 | 1,88E-02 |
| SMAD5      | ENSG00000113658 | -0,472 | 5,07E-04 | 1,88E-02 |
| SMG1P3     | ENSG00000180747 | -0,283 | 5,13E-04 | 1,90E-02 |
| DAW1       | ENSG00000123977 | -0,338 | 5,15E-04 | 1,90E-02 |
| SLC38A5    | ENSG00000017483 | 0,391  | 5,18E-04 | 1,91E-02 |
| ACBD4      | ENSG00000181513 | 0,278  | 5,27E-04 | 1,93E-02 |
| SUV39H2    | ENSG00000152455 | -0,517 | 5,28E-04 | 1,93E-02 |
| CPA4       | ENSG00000128510 | -0,847 | 5,34E-04 | 1,94E-02 |
| MROH6      | ENSG00000277781 | 0,678  | 5,31E-04 | 1,94E-02 |
| NFATC4     | ENSG00000285485 | 0,371  | 5,35E-04 | 1,94E-02 |
| TM7SF3     | ENSG00000064115 | -0,245 | 5,34E-04 | 1,94E-02 |
| UPP1       | ENSG00000183696 | 0,232  | 5,41E-04 | 1,96E-02 |
| ADGRB2     | ENSG00000121753 | 0,324  | 5,56E-04 | 2,01E-02 |
| ATOH8      | ENSG00000168874 | 0,364  | 5,61E-04 | 2,02E-02 |
| KNSTRN     | ENSG00000128944 | -0,257 | 5,71E-04 | 2,04E-02 |
| ODF3B      | ENSG00000177989 | 0,753  | 5,69E-04 | 2,04E-02 |
| SERPINB9   | ENSG00000170542 | 0,176  | 5,69E-04 | 2,04E-02 |
| PTP4A1     | ENSG00000112245 | -0,335 | 5,88E-04 | 2,09E-02 |
| TMC6       | ENSG00000141524 | 0,276  | 5,88E-04 | 2,09E-02 |
| SPTA1      | ENSG00000163554 | -1,154 | 5,92E-04 | 2,10E-02 |
| SENP1      | ENSG00000079387 | -0,270 | 5,95E-04 | 2,11E-02 |
| PIK3CD     | ENSG00000171608 | 0,296  | 6,11E-04 | 2,16E-02 |
| SPHK1      | ENSG00000176170 | 0,285  | 6,15E-04 | 2,16E-02 |
| TSPAN8     | ENSG00000127324 | -0,637 | 6,15E-04 | 2,16E-02 |
| CD34       | ENSG00000174059 | -0,226 | 6,22E-04 | 2,18E-02 |
| PLAC8      | ENSG00000145287 | -0,413 | 6,26E-04 | 2,19E-02 |
| E2F1       | ENSG00000101412 | 0,419  | 6,32E-04 | 2,20E-02 |
| AMOT       | ENSG00000126016 | -0,550 | 6,38E-04 | 2,22E-02 |

|          |                 |        |          |          |
|----------|-----------------|--------|----------|----------|
| C2CD2    | ENSG00000157617 | -0,279 | 6,60E-04 | 2,28E-02 |
| CST1     | ENSG00000170373 | 0,592  | 6,60E-04 | 2,28E-02 |
| SAT1     | ENSG00000130066 | 0,334  | 6,60E-04 | 2,28E-02 |
| EFNA2    | ENSG00000099617 | 0,374  | 6,66E-04 | 2,30E-02 |
| ANGEL2   | ENSG00000174606 | -0,371 | 6,77E-04 | 2,33E-02 |
| MCM9     | ENSG00000111877 | -0,297 | 6,81E-04 | 2,33E-02 |
| POLD1    | ENSG00000062822 | 0,320  | 6,82E-04 | 2,33E-02 |
| SH3TC2   | ENSG00000169247 | -0,555 | 6,88E-04 | 2,35E-02 |
| PHACTR4  | ENSG00000204138 | -0,233 | 6,93E-04 | 2,36E-02 |
| HNRNPLL  | ENSG00000143889 | -0,211 | 6,99E-04 | 2,37E-02 |
| MYO5C    | ENSG00000128833 | -0,322 | 7,01E-04 | 2,37E-02 |
| TREX1    | ENSG00000213689 | 0,275  | 7,02E-04 | 2,37E-02 |
| LPAR1    | ENSG00000198121 | -0,631 | 7,06E-04 | 2,38E-02 |
| DNM1P47  | ENSG00000259660 | -0,477 | 7,12E-04 | 2,40E-02 |
| ARHGAP17 | ENSG00000288353 | -0,465 | 7,24E-04 | 2,43E-02 |
| FBXO15   | ENSG00000141665 | -1,172 | 7,23E-04 | 2,43E-02 |
| MMRN1    | ENSG00000138722 | -0,492 | 7,26E-04 | 2,43E-02 |
| TNFSF15  | ENSG00000181634 | 0,218  | 7,37E-04 | 2,46E-02 |
| OCLN     | ENSG00000273814 | -0,336 | 7,39E-04 | 2,46E-02 |
| CDK19    | ENSG00000155111 | -0,377 | 7,45E-04 | 2,47E-02 |
| GALT     | ENSG00000213930 | 0,230  | 7,58E-04 | 2,51E-02 |
| C2CD4B   | ENSG00000205502 | 0,558  | 7,68E-04 | 2,54E-02 |
| IFI44L   | ENSG00000137959 | 0,720  | 7,78E-04 | 2,56E-02 |
| CCDC28B  | ENSG00000160050 | 0,254  | 7,83E-04 | 2,57E-02 |
| ADM2     | ENSG00000128165 | 0,487  | 7,92E-04 | 2,59E-02 |
| GAS2L3   | ENSG00000139354 | -0,436 | 7,90E-04 | 2,59E-02 |
| BATF3    | ENSG00000123685 | 0,662  | 7,95E-04 | 2,60E-02 |
| ARNTL    | ENSG00000133794 | -0,285 | 8,03E-04 | 2,61E-02 |
| TPPP3    | ENSG00000159713 | 0,496  | 8,03E-04 | 2,61E-02 |
| IPO5     | ENSG00000065150 | -0,156 | 8,09E-04 | 2,63E-02 |
| GNPMB    | ENSG00000136235 | -0,996 | 8,15E-04 | 2,64E-02 |
| IL3RA    | ENSG00000185291 | 0,238  | 8,30E-04 | 2,67E-02 |
| PDE3A    | ENSG00000172572 | -0,239 | 8,29E-04 | 2,67E-02 |
| SCUBE3   | ENSG00000146197 | -0,411 | 8,38E-04 | 2,69E-02 |
| ADAMTS12 | ENSG00000281690 | -0,546 | 8,53E-04 | 2,74E-02 |
| PIK3CG   | ENSG00000105851 | -0,918 | 8,54E-04 | 2,74E-02 |
| THOC3    | ENSG00000051596 | -0,528 | 8,70E-04 | 2,78E-02 |
| COL4A2   | ENSG00000134871 | 0,432  | 8,84E-04 | 2,82E-02 |
| BLOC1S3  | ENSG00000189114 | 0,447  | 9,02E-04 | 2,87E-02 |
| APOBEC3G | ENSG00000239713 | 0,249  | 9,11E-04 | 2,89E-02 |
| DHX58    | ENSG00000108771 | 0,330  | 9,19E-04 | 2,91E-02 |
| SGO1     | ENSG00000129810 | -0,365 | 9,31E-04 | 2,94E-02 |
| PIK3R3   | ENSG00000117461 | -0,301 | 9,33E-04 | 2,94E-02 |
| MOBP     | ENSG00000168314 | 0,777  | 9,37E-04 | 2,95E-02 |
| RACGAP1  | ENSG00000161800 | -0,327 | 9,45E-04 | 2,97E-02 |
| C19orf47 | ENSG00000160392 | 0,357  | 9,56E-04 | 2,99E-02 |
| DHCR7    | ENSG00000172893 | -0,348 | 9,60E-04 | 3,00E-02 |
| FHL3     | ENSG00000183386 | 0,276  | 9,60E-04 | 3,00E-02 |
| MELTF    | ENSG00000163975 | 0,373  | 9,63E-04 | 3,00E-02 |
| CCNE1    | ENSG00000105173 | 0,263  | 9,67E-04 | 3,00E-02 |
| CFAP410  | ENSG00000160226 | 0,304  | 9,90E-04 | 3,05E-02 |
| LRRC3    | ENSG00000160233 | 0,273  | 9,89E-04 | 3,05E-02 |
| PTTG1    | ENSG00000164611 | -0,362 | 9,88E-04 | 3,05E-02 |

|             |                 |        |          |          |
|-------------|-----------------|--------|----------|----------|
| SLC26A4     | ENSG00000091137 | -0,719 | 9,91E-04 | 3,05E-02 |
| NDE1        | ENSG00000275911 | -0,219 | 1,01E-03 | 3,10E-02 |
| TNFRSF21    | ENSG00000146072 | 0,172  | 1,01E-03 | 3,10E-02 |
| MMP28       | ENSG00000278843 | -1,256 | 1,02E-03 | 3,11E-02 |
| WASHC5      | ENSG00000164961 | -0,200 | 1,02E-03 | 3,11E-02 |
| NUDT22      | ENSG00000149761 | 0,284  | 1,03E-03 | 3,13E-02 |
| SIPA1       | ENSG00000213445 | 0,279  | 1,03E-03 | 3,13E-02 |
| PPP3CA      | ENSG00000138814 | -0,232 | 1,04E-03 | 3,15E-02 |
| MFSD3       | ENSG00000167700 | 0,235  | 1,04E-03 | 3,15E-02 |
| TYMP        | ENSG00000025708 | 0,669  | 1,04E-03 | 3,16E-02 |
| DNAH5       | ENSG00000039139 | 0,375  | 1,05E-03 | 3,16E-02 |
| AC005363.1  | NA              | 6,479  | 1,06E-03 | 3,18E-02 |
| IGF2BP3     | ENSG00000136231 | -0,313 | 1,06E-03 | 3,19E-02 |
| FEM1B       | ENSG00000169018 | -0,299 | 1,07E-03 | 3,20E-02 |
| RALB        | ENSG00000144118 | -0,165 | 1,07E-03 | 3,20E-02 |
| ASPHD2      | ENSG00000128203 | 0,209  | 1,08E-03 | 3,21E-02 |
| GALNT12     | ENSG00000119514 | 0,317  | 1,08E-03 | 3,21E-02 |
| RPL23AP87   | ENSG00000232938 | 2,313  | 1,08E-03 | 3,21E-02 |
| COMMD3-BMI1 | ENSG00000269897 | -0,606 | 1,09E-03 | 3,22E-02 |
| CDK20       | ENSG00000156345 | 0,409  | 1,09E-03 | 3,22E-02 |
| ACTL10      | ENSG00000288649 | 0,358  | 1,11E-03 | 3,23E-02 |
| AKT3        | ENSG00000275199 | -0,276 | 1,11E-03 | 3,23E-02 |
| BEST1       | ENSG00000167995 | 3,000  | 1,10E-03 | 3,23E-02 |
| ITPKC       | ENSG00000086544 | 0,230  | 1,11E-03 | 3,23E-02 |
| LRG1        | ENSG00000171236 | 0,915  | 1,10E-03 | 3,23E-02 |
| TNRC18      | ENSG00000182095 | -0,235 | 1,10E-03 | 3,23E-02 |
| VPS8        | ENSG00000156931 | -0,319 | 1,10E-03 | 3,23E-02 |
| PRRC2B      | ENSG00000288701 | -0,252 | 1,11E-03 | 3,23E-02 |
| CHST6       | ENSG00000183196 | 0,461  | 1,14E-03 | 3,30E-02 |
| CLDN10      | ENSG00000134873 | -0,387 | 1,16E-03 | 3,36E-02 |
| ELK3        | ENSG00000111145 | -0,267 | 1,16E-03 | 3,36E-02 |
| IGFBP1      | ENSG00000146678 | -0,548 | 1,16E-03 | 3,36E-02 |
| TXNIP       | ENSG00000265972 | -0,485 | 1,16E-03 | 3,36E-02 |
| GLCE        | ENSG00000138604 | -0,244 | 1,17E-03 | 3,37E-02 |
| PLCD3       | ENSG00000161714 | -0,285 | 1,17E-03 | 3,37E-02 |
| CHKB        | ENSG00000100288 | 0,197  | 1,19E-03 | 3,40E-02 |
| POLD4       | ENSG00000175482 | 0,346  | 1,20E-03 | 3,42E-02 |
| FCF1        | ENSG00000119616 | -0,213 | 1,21E-03 | 3,43E-02 |
| SP110       | ENSG00000135899 | 0,241  | 1,20E-03 | 3,43E-02 |
| LGALS3BP    | ENSG00000108679 | 0,620  | 1,21E-03 | 3,43E-02 |
| OAS3        | ENSG00000111331 | 0,322  | 1,23E-03 | 3,49E-02 |
| PLEKHA4     | ENSG00000105559 | 0,272  | 1,24E-03 | 3,51E-02 |
| ASPHD1      | ENSG00000174939 | 0,680  | 1,26E-03 | 3,55E-02 |
| ITPRIPL1    | ENSG00000198885 | 0,456  | 1,26E-03 | 3,55E-02 |
| S1PR2       | ENSG00000267534 | 0,346  | 1,26E-03 | 3,55E-02 |
| SIRT3       | ENSG00000142082 | 0,207  | 1,26E-03 | 3,55E-02 |
| UBA6        | ENSG00000033178 | -0,346 | 1,27E-03 | 3,56E-02 |
| AMDHD2      | ENSG00000162066 | 0,275  | 1,27E-03 | 3,56E-02 |
| AGFG1       | ENSG00000173744 | -0,166 | 1,29E-03 | 3,60E-02 |
| DEPDC1      | ENSG00000024526 | -0,581 | 1,31E-03 | 3,66E-02 |
| NCEH1       | ENSG00000144959 | -0,174 | 1,32E-03 | 3,69E-02 |
| STEAP1B     | ENSG00000105889 | -0,254 | 1,33E-03 | 3,71E-02 |
| RMND5A      | ENSG00000153561 | -0,187 | 1,35E-03 | 3,74E-02 |



|            |                 |        |          |          |
|------------|-----------------|--------|----------|----------|
| APPBP2     | ENSG00000062725 | -0,365 | 1,36E-03 | 3,76E-02 |
| MALL       | ENSG00000144063 | -0,226 | 1,36E-03 | 3,76E-02 |
| MAP3K5     | ENSG00000197442 | -0,280 | 1,37E-03 | 3,78E-02 |
| CCS        | ENSG00000173992 | 0,222  | 1,38E-03 | 3,81E-02 |
| SELP       | ENSG00000174175 | -0,676 | 1,39E-03 | 3,81E-02 |
| P4HA2      | ENSG00000072682 | 0,217  | 1,40E-03 | 3,84E-02 |
| NUDT18     | ENSG00000275074 | 0,274  | 1,41E-03 | 3,86E-02 |
| DOCK4      | ENSG00000128512 | -0,288 | 1,43E-03 | 3,91E-02 |
| SERPINE1   | ENSG00000106366 | 0,263  | 1,43E-03 | 3,91E-02 |
| CDC20      | ENSG00000117399 | -0,358 | 1,44E-03 | 3,91E-02 |
| LAMP2      | ENSG00000005893 | -0,141 | 1,44E-03 | 3,91E-02 |
| SAMHD1     | ENSG00000101347 | -0,369 | 1,45E-03 | 3,92E-02 |
| FANCG      | ENSG00000221829 | 0,345  | 1,45E-03 | 3,94E-02 |
| KYNU       | ENSG00000115919 | 0,782  | 1,46E-03 | 3,95E-02 |
| RSC1A1     | ENSG00000215695 | -0,388 | 1,47E-03 | 3,96E-02 |
| SNX6       | ENSG00000129515 | -0,454 | 1,47E-03 | 3,97E-02 |
| DIS3L      | ENSG00000166938 | -0,276 | 1,48E-03 | 3,98E-02 |
| FLI1       | ENSG00000151702 | -0,212 | 1,48E-03 | 3,98E-02 |
| SMG1P1     | ENSG00000237296 | -0,304 | 1,50E-03 | 4,00E-02 |
| C6orf136   | ENSG00000224120 | 0,223  | 1,51E-03 | 4,04E-02 |
| ANKRD55    | ENSG00000164512 | 0,227  | 1,53E-03 | 4,07E-02 |
| NUSAP1     | ENSG00000137804 | -0,257 | 1,54E-03 | 4,10E-02 |
| MCTP2      | ENSG00000140563 | 0,553  | 1,55E-03 | 4,12E-02 |
| SMIM10     | ENSG00000184785 | -0,426 | 1,56E-03 | 4,12E-02 |
| IRF7       | ENSG00000276561 | 0,301  | 1,56E-03 | 4,14E-02 |
| FBXW4      | ENSG00000107829 | 0,228  | 1,57E-03 | 4,15E-02 |
| PDXK       | ENSG00000160209 | 0,284  | 1,60E-03 | 4,22E-02 |
| SIK1B      | ENSG00000275993 | 0,287  | 1,62E-03 | 4,26E-02 |
| ALDH3A2    | ENSG00000072210 | -0,186 | 1,62E-03 | 4,27E-02 |
| MICAL1     | ENSG00000135596 | 0,209  | 1,63E-03 | 4,27E-02 |
| RNASEK     | ENSG00000219200 | 0,259  | 1,63E-03 | 4,27E-02 |
| POGLUT3    | ENSG00000178202 | -0,247 | 1,64E-03 | 4,29E-02 |
| PIF1       | ENSG00000140451 | -0,318 | 1,69E-03 | 4,39E-02 |
| SQLE       | ENSG00000104549 | -0,304 | 1,69E-03 | 4,39E-02 |
| AP000295.1 | NA              | -0,791 | 1,72E-03 | 4,42E-02 |
| ARHGAP29   | ENSG00000137962 | -0,385 | 1,70E-03 | 4,42E-02 |
| HSD3B7     | ENSG00000099377 | 0,300  | 1,71E-03 | 4,42E-02 |
| KAT2B      | ENSG00000114166 | -0,353 | 1,72E-03 | 4,42E-02 |
| LZTFL1     | ENSG00000163818 | -0,296 | 1,71E-03 | 4,42E-02 |
| PARPBP     | ENSG00000185480 | -0,421 | 1,72E-03 | 4,42E-02 |
| RRAS       | ENSG00000126458 | 0,247  | 1,72E-03 | 4,42E-02 |
| TAX1BP3    | ENSG00000213977 | 0,221  | 1,70E-03 | 4,42E-02 |
| YAP1       | ENSG00000137693 | -0,249 | 1,73E-03 | 4,42E-02 |
| CFLAR      | ENSG00000003402 | 0,156  | 1,74E-03 | 4,44E-02 |
| ZBTB21     | ENSG00000173276 | -0,333 | 1,74E-03 | 4,44E-02 |
| NPAS2      | ENSG00000170485 | -0,270 | 1,75E-03 | 4,45E-02 |
| SPIN2B     | ENSG00000186787 | -0,244 | 1,75E-03 | 4,45E-02 |
| ARHGAP4    | ENSG00000089820 | 0,214  | 1,77E-03 | 4,48E-02 |
| GPD1L      | ENSG00000152642 | -0,209 | 1,77E-03 | 4,48E-02 |
| MEF2A      | ENSG00000068305 | -0,344 | 1,79E-03 | 4,52E-02 |
| RGS5       | ENSG00000232995 | -0,291 | 1,80E-03 | 4,54E-02 |
| YPEL3      | ENSG00000090238 | 0,217  | 1,80E-03 | 4,54E-02 |
| PRRX1      | ENSG00000116132 | 1,003  | 1,81E-03 | 4,54E-02 |



|          |                 |        |          |          |
|----------|-----------------|--------|----------|----------|
| YIPF1    | ENSG00000058799 | 0,223  | 1,84E-03 | 4,62E-02 |
| PIEZO2   | ENSG00000154864 | -0,312 | 1,85E-03 | 4,64E-02 |
| IL1R1    | ENSG00000115594 | -0,282 | 1,86E-03 | 4,65E-02 |
| SAMD8    | ENSG00000156671 | -0,225 | 1,86E-03 | 4,66E-02 |
| NUDT4B   | ENSG00000177144 | -0,160 | 1,89E-03 | 4,73E-02 |
| SULF1    | ENSG00000137573 | -0,415 | 1,90E-03 | 4,73E-02 |
| ADGRF3   | ENSG00000173567 | 2,100  | 1,91E-03 | 4,75E-02 |
| PGM2     | ENSG00000169299 | -0,220 | 1,91E-03 | 4,75E-02 |
| MOV10    | ENSG00000155363 | 0,221  | 1,93E-03 | 4,78E-02 |
| C1S      | ENSG00000182326 | 1,036  | 1,95E-03 | 4,83E-02 |
| FAM114A1 | ENSG00000197712 | -0,168 | 1,96E-03 | 4,83E-02 |
| KPNA1    | ENSG00000114030 | -0,182 | 1,96E-03 | 4,83E-02 |
| SCLT1    | ENSG00000151466 | -0,365 | 1,98E-03 | 4,88E-02 |
| MARCHF2  | ENSG00000099785 | 0,189  | 1,99E-03 | 4,89E-02 |
| CMKLR1   | ENSG00000174600 | -1,002 | 2,00E-03 | 4,91E-02 |
| DARS2    | ENSG00000117593 | -0,281 | 2,01E-03 | 4,92E-02 |
| B3GAT3   | ENSG00000149541 | 0,247  | 2,02E-03 | 4,92E-02 |
| CCDC190  | ENSG00000185860 | -0,264 | 2,02E-03 | 4,92E-02 |
| CD109    | ENSG00000156535 | -0,318 | 2,02E-03 | 4,92E-02 |
| SBNO2    | ENSG00000278788 | 0,304  | 2,03E-03 | 4,92E-02 |
| STYXL1   | ENSG00000127952 | 0,217  | 2,01E-03 | 4,92E-02 |
| CYSTM1   | ENSG00000120306 | 0,205  | 2,04E-03 | 4,95E-02 |
| VPS26A   | ENSG00000122958 | -0,298 | 2,05E-03 | 4,96E-02 |
| PTK2     | ENSG00000169398 | -0,273 | 2,06E-03 | 4,98E-02 |
| PRKAR2B  | ENSG00000284096 | -0,307 | 2,07E-03 | 4,99E-02 |
| RBPM5    | ENSG00000166831 | 0,311  | 2,07E-03 | 4,99E-02 |
| RGS4     | ENSG00000117152 | -0,258 | 2,08E-03 | 5,00E-02 |
| TAP2     | ENSG00000225967 | 0,212  | 2,08E-03 | 5,00E-02 |

**Supplementary Table S6: Differentially expressed genes upon LPS treatment of cells expressing APEX1(1-20).** DGE calculated using the R package DESeq2 comparing sam-ples of cells transduced with the lentivirus expressing APEX1(1-20) and treated with active LPS versus treated with detoxified LPS. The L2FC (Log 2-fold change) states the average difference in gene expression between both treatments. Positive L2FC values denote upregulation by LPS treatment, negative values downregulation. Wald test from DESeq2 was used to calculate the significance of the change in the expression. The adjusted p-values take the number of tested genes into account, the threshold for the adjusted p-value was 0.05.

| gene name   | Ensembl gene ID | L2FC    | p-value   | adusted p-value |
|-------------|-----------------|---------|-----------|-----------------|
| LAMC2       | ENSG00000058085 | 2,107   | 1,12E-198 | 1,76E-194       |
| SOD2        | ENSG00000112096 | 1,108   | 1,25E-66  | 9,84E-63        |
| EBI3        | ENSG00000105246 | 2,271   | 1,43E-53  | 7,47E-50        |
| CXCL6       | ENSG00000124875 | 1,655   | 1,16E-49  | 4,57E-46        |
| MMP10       | ENSG00000166670 | 1,106   | 1,31E-46  | 4,12E-43        |
| CCL2        | ENSG00000108691 | 1,060   | 7,21E-45  | 1,88E-41        |
| CTSS        | ENSG00000163131 | 1,287   | 6,43E-41  | 1,44E-37        |
| CFB         | ENSG00000242335 | 1,565   | 1,12E-40  | 2,21E-37        |
| UBD         | ENSG00000226898 | 2,203   | 9,00E-40  | 1,57E-36        |
| CTSK        | ENSG00000143387 | 1,417   | 1,61E-36  | 2,53E-33        |
| POU2F2      | ENSG00000028277 | 1,240   | 1,29E-35  | 1,83E-32        |
| LTB         | ENSG00000223448 | 1,169   | 9,43E-27  | 1,23E-23        |
| IGFBP3      | ENSG00000146674 | -0,776  | 2,00E-26  | 2,42E-23        |
| IL32        | ENSG00000008517 | 1,115   | 5,74E-26  | 6,43E-23        |
| CNTNAP1     | ENSG00000108797 | 0,597   | 1,69E-24  | 1,77E-21        |
| IFI27       | ENSG00000275214 | 0,640   | 2,88E-23  | 2,82E-20        |
| PAPLN       | ENSG00000100767 | 1,408   | 9,10E-23  | 8,39E-20        |
| ANO9        | ENSG00000185101 | 4,416   | 3,91E-20  | 3,41E-17        |
| ISG20       | ENSG00000172183 | 0,752   | 1,23E-19  | 1,02E-16        |
| S100A3      | ENSG00000188015 | 1,601   | 7,48E-19  | 5,87E-16        |
| CXCL1       | ENSG00000163739 | 0,959   | 1,42E-18  | 1,06E-15        |
| CXCL5       | ENSG00000163735 | 1,745   | 1,40E-17  | 9,96E-15        |
| METTL7A     | ENSG00000185432 | -0,636  | 3,12E-16  | 2,13E-13        |
| AC091951.4  | NA              | 4,960   | 5,48E-16  | 3,58E-13        |
| THSD4       | ENSG00000187720 | 0,378   | 6,63E-16  | 4,16E-13        |
| NEURL1B     | ENSG00000214357 | -0,822  | 3,17E-15  | 1,91E-12        |
| CXCL8       | ENSG00000169429 | 1,039   | 6,64E-15  | 3,86E-12        |
| MAMDC2      | ENSG00000278608 | 0,926   | 2,34E-14  | 1,31E-11        |
| CR354443.1  | NA              | 32,453  | 2,78E-14  | 1,50E-11        |
| CCL15-CCL14 | ENSG00000282521 | -0,637  | 6,52E-14  | 3,30E-11        |
| FCF1P2      | ENSG00000228638 | -23,428 | 6,46E-14  | 3,30E-11        |
| MX1         | ENSG00000157601 | 0,881   | 1,11E-13  | 5,45E-11        |
| SLC7A2      | ENSG00000003989 | 0,614   | 2,48E-13  | 1,18E-10        |
| H3P6        | ENSG00000235655 | 30,910  | 2,90E-13  | 1,34E-10        |
| PLA2G4C     | ENSG00000105499 | 0,669   | 3,43E-13  | 1,54E-10        |
| TBC1D3K     | ENSG00000275153 | -30,254 | 6,41E-13  | 2,79E-10        |
| HLA-B       | ENSG00000206450 | 0,830   | 2,21E-12  | 9,37E-10        |
| AL451062.4  | NA              | -29,257 | 3,51E-12  | 1,45E-09        |
| LYPD6       | ENSG00000187123 | 0,545   | 2,51E-11  | 1,01E-08        |
| ITGB4       | ENSG00000132470 | -0,899  | 3,01E-11  | 1,18E-08        |
| AKAP12      | ENSG00000131016 | 0,392   | 3,13E-11  | 1,20E-08        |
| ACBD7       | ENSG00000176244 | -0,963  | 3,63E-11  | 1,34E-08        |
| PXDN        | ENSG00000130508 | 0,668   | 3,67E-11  | 1,34E-08        |
| LAMP3       | ENSG00000078081 | 0,580   | 3,98E-11  | 1,42E-08        |
| IL4I1       | ENSG00000104951 | 0,582   | 1,45E-10  | 5,05E-08        |

|            |                 |         |          |          |
|------------|-----------------|---------|----------|----------|
| LIPG       | ENSG00000101670 | 0,605   | 1,48E-10 | 5,05E-08 |
| CTHRC1     | ENSG00000164932 | 0,586   | 1,60E-10 | 5,34E-08 |
| ICAM1      | ENSG00000090339 | 0,518   | 2,53E-10 | 8,27E-08 |
| ALOX5AP    | ENSG00000132965 | 1,792   | 4,57E-10 | 1,46E-07 |
| CD69       | ENSG00000110848 | 1,109   | 8,28E-10 | 2,60E-07 |
| CYB5R2     | ENSG00000166394 | 0,651   | 9,12E-10 | 2,80E-07 |
| KLF2       | ENSG00000127528 | -0,494  | 1,42E-09 | 4,28E-07 |
| MMP19      | ENSG00000123342 | 0,700   | 1,82E-09 | 5,29E-07 |
| SRP9P1     | ENSG00000180581 | 25,646  | 1,82E-09 | 5,29E-07 |
| CD34       | ENSG00000174059 | -0,395  | 1,98E-09 | 5,66E-07 |
| PSMB9      | ENSG00000243958 | 0,523   | 2,11E-09 | 5,90E-07 |
| CXCL2      | ENSG00000081041 | 0,820   | 3,17E-09 | 8,72E-07 |
| IFI6       | ENSG00000126709 | 0,493   | 4,18E-09 | 1,13E-06 |
| KIT        | ENSG00000157404 | 0,351   | 5,37E-09 | 1,43E-06 |
| PPL        | ENSG00000118898 | -1,098  | 6,56E-09 | 1,72E-06 |
| TFPI2      | ENSG00000105825 | 0,607   | 6,91E-09 | 1,78E-06 |
| C2CD4A     | ENSG00000198535 | 0,816   | 1,09E-08 | 2,76E-06 |
| AP005018.2 | NA              | -23,882 | 1,38E-08 | 3,43E-06 |
| CCL14      | ENSG00000277236 | -0,599  | 1,43E-08 | 3,51E-06 |
| F2RL1      | ENSG00000164251 | 0,378   | 2,81E-08 | 6,78E-06 |
| RNASE1     | ENSG00000129538 | -0,388  | 3,16E-08 | 7,52E-06 |
| ALDH1A1    | ENSG00000165092 | -0,420  | 3,70E-08 | 8,66E-06 |
| NID2       | ENSG00000087303 | 0,901   | 4,00E-08 | 9,23E-06 |
| NFKBIZ     | ENSG00000144802 | 0,715   | 4,07E-08 | 9,25E-06 |
| P2RX4      | ENSG00000135124 | 0,313   | 6,22E-08 | 1,39E-05 |
| SOX18      | ENSG00000203883 | -0,314  | 7,70E-08 | 1,70E-05 |
| AQP1       | ENSG00000240583 | -1,437  | 9,16E-08 | 2,00E-05 |
| CCNE1      | ENSG00000105173 | 0,424   | 1,00E-07 | 2,16E-05 |
| CXCL3      | ENSG00000163734 | 0,498   | 1,33E-07 | 2,81E-05 |
| CCL20      | ENSG00000115009 | 0,878   | 1,41E-07 | 2,94E-05 |
| ITGAV      | ENSG00000138448 | 0,580   | 1,45E-07 | 2,99E-05 |
| ACE        | ENSG00000159640 | -0,668  | 1,56E-07 | 3,18E-05 |
| LYVE1      | ENSG00000133800 | -0,766  | 1,64E-07 | 3,29E-05 |
| TNFRSF9    | ENSG00000049249 | 1,044   | 2,28E-07 | 4,53E-05 |
| STAP2      | ENSG00000178078 | 0,406   | 2,37E-07 | 4,65E-05 |
| PRICKLE1   | ENSG00000139174 | -0,462  | 2,88E-07 | 5,57E-05 |
| OAS3       | ENSG00000111331 | 0,509   | 3,18E-07 | 6,08E-05 |
| ANGPT2     | ENSG00000091879 | 0,361   | 4,34E-07 | 8,20E-05 |
| BST1       | ENSG00000109743 | 0,352   | 5,75E-07 | 1,07E-04 |
| IL1A       | ENSG00000115008 | 0,680   | 6,75E-07 | 1,25E-04 |
| MEST       | ENSG00000106484 | -0,406  | 7,83E-07 | 1,43E-04 |
| CCM2L      | ENSG00000101331 | -0,448  | 8,16E-07 | 1,47E-04 |
| IFIT1      | ENSG00000185745 | 0,962   | 9,22E-07 | 1,64E-04 |
| CRACR2B    | ENSG00000177685 | -0,419  | 9,45E-07 | 1,65E-04 |
| OAS1       | ENSG00000089127 | 0,474   | 9,42E-07 | 1,65E-04 |
| INHBB      | ENSG00000163083 | -0,814  | 9,82E-07 | 1,69E-04 |
| PAPPA2     | ENSG00000116183 | 1,562   | 9,88E-07 | 1,69E-04 |
| TXNIP      | ENSG00000265972 | -0,730  | 1,01E-06 | 1,70E-04 |
| GJA4       | ENSG00000187513 | -0,568  | 1,05E-06 | 1,75E-04 |
| IGFBP4     | ENSG00000141753 | -0,294  | 1,18E-06 | 1,95E-04 |
| TNFSF15    | ENSG00000181634 | 0,311   | 1,38E-06 | 2,25E-04 |
| ADAMTS18   | ENSG00000140873 | -0,514  | 1,55E-06 | 2,50E-04 |
| FRY        | ENSG00000073910 | -0,217  | 1,61E-06 | 2,58E-04 |

|            |                 |        |          |          |
|------------|-----------------|--------|----------|----------|
| PLCD3      | ENSG00000161714 | -0,419 | 1,81E-06 | 2,87E-04 |
| IL7R       | ENSG00000168685 | 0,419  | 1,89E-06 | 2,96E-04 |
| TNC        | ENSG00000041982 | 2,315  | 1,99E-06 | 3,09E-04 |
| SYNJ2      | ENSG00000078269 | 0,174  | 2,09E-06 | 3,21E-04 |
| MSMP       | ENSG00000215183 | -0,386 | 3,03E-06 | 4,62E-04 |
| GMFG       | ENSG00000130755 | 0,286  | 3,12E-06 | 4,70E-04 |
| OCIAD2     | ENSG00000145247 | 0,388  | 3,39E-06 | 5,07E-04 |
| TMEM120A   | ENSG00000189077 | 0,384  | 3,56E-06 | 5,27E-04 |
| CSF2       | ENSG00000164400 | 1,186  | 3,78E-06 | 5,54E-04 |
| CREB5      | ENSG00000146592 | 0,326  | 4,06E-06 | 5,89E-04 |
| EPSTI1     | ENSG00000133106 | 0,947  | 4,15E-06 | 5,93E-04 |
| KIF20A     | ENSG00000112984 | -0,438 | 4,16E-06 | 5,93E-04 |
| PRIM1      | ENSG00000198056 | 0,506  | 4,50E-06 | 6,36E-04 |
| TMEM184A   | ENSG00000164855 | 1,991  | 4,78E-06 | 6,69E-04 |
| OAS2       | ENSG00000111335 | 0,745  | 5,53E-06 | 7,67E-04 |
| CAV1       | ENSG00000105974 | -0,277 | 7,04E-06 | 9,64E-04 |
| NRROS      | ENSG00000174004 | -0,303 | 7,06E-06 | 9,64E-04 |
| TNIP3      | ENSG00000050730 | 1,239  | 7,28E-06 | 9,85E-04 |
| ADAMTS15   | ENSG00000166106 | -1,383 | 7,59E-06 | 1,02E-03 |
| TAPBP      | ENSG00000206281 | 0,364  | 8,63E-06 | 1,15E-03 |
| ABCG2      | ENSG00000118777 | -0,578 | 9,42E-06 | 1,24E-03 |
| NLRC3      | ENSG00000167984 | 0,376  | 9,48E-06 | 1,24E-03 |
| LRRC75A    | ENSG00000181350 | -0,393 | 1,00E-05 | 1,30E-03 |
| PRSS12     | ENSG00000164099 | 0,973  | 1,02E-05 | 1,32E-03 |
| IFI44L     | ENSG00000137959 | 0,935  | 1,18E-05 | 1,51E-03 |
| EGLN3      | ENSG00000129521 | -1,171 | 1,28E-05 | 1,62E-03 |
| TSPAN11    | ENSG00000110900 | -0,436 | 1,33E-05 | 1,67E-03 |
| QPCT       | ENSG00000115828 | 0,564  | 1,38E-05 | 1,72E-03 |
| TNFRSF4    | ENSG00000186827 | 0,805  | 1,41E-05 | 1,75E-03 |
| COL1A2     | ENSG00000164692 | -0,415 | 1,53E-05 | 1,87E-03 |
| CCNB2      | ENSG00000157456 | -0,387 | 1,64E-05 | 1,98E-03 |
| EXO1       | ENSG00000174371 | 0,511  | 1,64E-05 | 1,98E-03 |
| CFLAR      | ENSG00000003402 | 0,213  | 1,90E-05 | 2,27E-03 |
| ZNF365     | ENSG00000138311 | 0,547  | 2,07E-05 | 2,47E-03 |
| ALDH1A2    | ENSG00000128918 | -0,324 | 2,29E-05 | 2,68E-03 |
| GALNT18    | ENSG00000110328 | 0,563  | 2,28E-05 | 2,68E-03 |
| APLN       | ENSG00000171388 | -0,484 | 2,33E-05 | 2,71E-03 |
| HMGCS1     | ENSG00000112972 | -0,321 | 2,41E-05 | 2,78E-03 |
| ARHGDIG    | ENSG00000242173 | 0,442  | 2,47E-05 | 2,83E-03 |
| ZC3H12A    | ENSG00000163874 | 0,454  | 2,53E-05 | 2,87E-03 |
| ZNF467     | ENSG00000181444 | -0,453 | 3,02E-05 | 3,40E-03 |
| SELENOT    | ENSG00000198843 | 0,254  | 3,21E-05 | 3,59E-03 |
| ACAT2      | ENSG00000120437 | -0,283 | 3,27E-05 | 3,61E-03 |
| GPX3       | ENSG00000211445 | -0,573 | 3,27E-05 | 3,61E-03 |
| GGT5       | ENSG00000099998 | -0,353 | 3,35E-05 | 3,66E-03 |
| HLA-A      | ENSG00000227715 | 0,289  | 3,36E-05 | 3,66E-03 |
| SEMA7A     | ENSG00000288455 | 0,486  | 3,81E-05 | 4,13E-03 |
| YIPF5      | ENSG00000145817 | 0,269  | 3,90E-05 | 4,19E-03 |
| ASS1       | ENSG00000130707 | -0,446 | 4,11E-05 | 4,39E-03 |
| MGARP      | ENSG00000137463 | -0,451 | 4,35E-05 | 4,61E-03 |
| FP565260.3 | NA              | 0,386  | 4,38E-05 | 4,61E-03 |
| MALL       | ENSG00000144063 | -0,288 | 4,47E-05 | 4,67E-03 |
| MRAP2      | ENSG00000135324 | -0,384 | 4,63E-05 | 4,81E-03 |

|            |                 |        |          |          |
|------------|-----------------|--------|----------|----------|
| IL1RL1     | ENSG00000115602 | 0,254  | 4,78E-05 | 4,90E-03 |
| RAMP2      | ENSG00000131477 | -0,465 | 4,75E-05 | 4,90E-03 |
| CD44       | ENSG00000026508 | 0,503  | 5,20E-05 | 5,30E-03 |
| LRTOMT     | ENSG00000184154 | -0,402 | 5,45E-05 | 5,51E-03 |
| AC005520.3 | NA              | -1,051 | 5,60E-05 | 5,63E-03 |
| CSF3       | ENSG00000108342 | 1,064  | 5,92E-05 | 5,91E-03 |
| FBXO32     | ENSG00000156804 | 0,351  | 6,03E-05 | 5,99E-03 |
| DHH        | ENSG00000139549 | -0,365 | 6,08E-05 | 5,99E-03 |
| RALB       | ENSG00000144118 | -0,201 | 6,25E-05 | 6,13E-03 |
| HPSE       | ENSG00000173083 | 0,245  | 6,31E-05 | 6,15E-03 |
| LGALS3BP   | ENSG00000108679 | 0,760  | 6,40E-05 | 6,19E-03 |
| TUSC3      | ENSG00000104723 | 0,294  | 6,43E-05 | 6,19E-03 |
| SH3BP1     | ENSG00000100092 | 0,715  | 6,69E-05 | 6,40E-03 |
| SMIM3      | ENSG00000256235 | -0,424 | 6,75E-05 | 6,42E-03 |
| NPTN       | ENSG00000156642 | 0,193  | 6,88E-05 | 6,51E-03 |
| ABLIM2     | ENSG00000163995 | -1,741 | 8,11E-05 | 7,58E-03 |
| MYRIP      | ENSG00000170011 | -0,301 | 8,15E-05 | 7,58E-03 |
| TCF15      | ENSG00000125878 | -0,467 | 8,17E-05 | 7,58E-03 |
| C4B        | ENSG00000224639 | -1,377 | 8,74E-05 | 7,99E-03 |
| CASP1      | ENSG00000137752 | 0,501  | 8,76E-05 | 7,99E-03 |
| KIF12      | ENSG00000136883 | 0,542  | 8,73E-05 | 7,99E-03 |
| SERPINA3   | ENSG00000196136 | 1,848  | 8,87E-05 | 8,05E-03 |
| COLGALT1   | ENSG00000130309 | 0,367  | 9,66E-05 | 8,71E-03 |
| AFF3       | ENSG00000144218 | 1,033  | 1,05E-04 | 9,24E-03 |
| EIF3CL     | ENSG00000205609 | -0,720 | 1,04E-04 | 9,24E-03 |
| ERMP1      | ENSG00000099219 | -0,243 | 1,04E-04 | 9,24E-03 |
| HLA-H      | ENSG00000231904 | 0,357  | 1,05E-04 | 9,24E-03 |
| SPACA6     | ENSG00000182310 | -0,405 | 1,04E-04 | 9,24E-03 |
| CCNB1      | ENSG00000134057 | -0,396 | 1,06E-04 | 9,27E-03 |
| MYZAP      | ENSG00000263155 | -0,356 | 1,19E-04 | 1,03E-02 |
| C20orf204  | ENSG00000196421 | -0,498 | 1,21E-04 | 1,04E-02 |
| CGNL1      | ENSG00000128849 | -0,203 | 1,21E-04 | 1,04E-02 |
| SLC6A15    | ENSG00000072041 | 0,655  | 1,22E-04 | 1,04E-02 |
| DHRS3      | ENSG00000162496 | 0,284  | 1,24E-04 | 1,05E-02 |
| OASL       | ENSG00000135114 | 1,044  | 1,24E-04 | 1,05E-02 |
| DNAH5      | ENSG00000039139 | 0,437  | 1,26E-04 | 1,05E-02 |
| FBLN2      | ENSG00000163520 | -0,677 | 1,26E-04 | 1,05E-02 |
| AOX1       | ENSG00000138356 | 0,620  | 1,39E-04 | 1,15E-02 |
| ICOSLG     | ENSG00000160223 | 0,377  | 1,40E-04 | 1,15E-02 |
| LHX6       | ENSG00000106852 | -0,471 | 1,41E-04 | 1,15E-02 |
| SLIT3      | ENSG00000184347 | 0,552  | 1,42E-04 | 1,16E-02 |
| AC019117.4 | NA              | 8,471  | 1,44E-04 | 1,17E-02 |
| MAP3K6     | ENSG00000142733 | 0,299  | 1,49E-04 | 1,20E-02 |
| ABI3BP     | ENSG00000154175 | 0,365  | 1,52E-04 | 1,22E-02 |
| KYNU       | ENSG00000115919 | 0,927  | 1,53E-04 | 1,22E-02 |
| SAPCD2     | ENSG00000186193 | -0,366 | 1,52E-04 | 1,22E-02 |
| MTMR7      | ENSG00000003987 | 0,923  | 1,53E-04 | 1,22E-02 |
| GIMAP1     | ENSG00000213203 | -0,265 | 1,60E-04 | 1,26E-02 |
| NQO1       | ENSG00000181019 | -0,281 | 1,60E-04 | 1,26E-02 |
| CASKIN1    | ENSG00000167971 | -2,314 | 1,67E-04 | 1,30E-02 |
| CA4        | ENSG00000167434 | -1,172 | 1,76E-04 | 1,37E-02 |
| LY75-CD302 | ENSG00000248672 | 0,547  | 1,79E-04 | 1,38E-02 |
| AC244260.1 | NA              | 8,622  | 1,92E-04 | 1,48E-02 |

|         |                 |        |          |          |
|---------|-----------------|--------|----------|----------|
| CDH4    | ENSG00000280641 | -0,476 | 1,93E-04 | 1,48E-02 |
| GALNT12 | ENSG00000119514 | 0,363  | 1,95E-04 | 1,49E-02 |
| PCK2    | ENSG00000285241 | 0,283  | 2,15E-04 | 1,63E-02 |
| ABCC2   | ENSG00000023839 | -0,663 | 2,17E-04 | 1,63E-02 |
| CAMSAP3 | ENSG00000076826 | -0,935 | 2,17E-04 | 1,63E-02 |
| GUCY1A1 | ENSG00000164116 | -0,911 | 2,21E-04 | 1,65E-02 |
| MAP3K14 | ENSG00000282637 | -0,384 | 2,28E-04 | 1,70E-02 |
| ALDH1L2 | ENSG00000136010 | 0,311  | 2,30E-04 | 1,70E-02 |
| IFI44   | ENSG00000137965 | 0,499  | 2,32E-04 | 1,71E-02 |
| BCAM    | ENSG00000187244 | -0,275 | 2,37E-04 | 1,74E-02 |
| TCF7    | ENSG00000081059 | 0,391  | 2,44E-04 | 1,78E-02 |
| SCNN1B  | ENSG00000168447 | -2,117 | 2,45E-04 | 1,78E-02 |
| CHRNA1  | ENSG00000138435 | 0,426  | 2,48E-04 | 1,79E-02 |
| PLAAT4  | ENSG00000133321 | 0,548  | 2,56E-04 | 1,84E-02 |
| CYP1A1  | ENSG00000140465 | -0,508 | 2,66E-04 | 1,91E-02 |
| PRCP    | ENSG00000137509 | 0,175  | 2,71E-04 | 1,93E-02 |
| NOS3    | ENSG00000164867 | -0,330 | 2,80E-04 | 1,99E-02 |
| CLEC14A | ENSG00000176435 | -0,190 | 2,82E-04 | 1,99E-02 |
| IFI35   | ENSG00000068079 | 0,344  | 2,86E-04 | 2,01E-02 |
| PTGS2   | ENSG00000073756 | 0,572  | 2,92E-04 | 2,05E-02 |
| POSTN   | ENSG00000133110 | -0,539 | 3,01E-04 | 2,10E-02 |
| DUXAP9  | ENSG00000225210 | 0,284  | 3,07E-04 | 2,13E-02 |
| MYPN    | ENSG00000138347 | 0,620  | 3,15E-04 | 2,17E-02 |
| PIR     | ENSG00000087842 | -0,566 | 3,27E-04 | 2,25E-02 |
| AK4     | ENSG00000162433 | 0,170  | 3,35E-04 | 2,29E-02 |
| IFT122  | ENSG00000163913 | -0,270 | 3,36E-04 | 2,29E-02 |
| P2RY6   | ENSG00000171631 | 1,128  | 3,53E-04 | 2,40E-02 |
| DPYSL3  | ENSG00000113657 | 0,257  | 3,60E-04 | 2,43E-02 |
| ATP2B4  | ENSG00000058668 | -0,175 | 3,69E-04 | 2,48E-02 |
| GK      | ENSG00000198814 | 0,285  | 3,79E-04 | 2,52E-02 |
| SELENOM | ENSG00000198832 | 0,345  | 3,78E-04 | 2,52E-02 |
| ZNF219  | ENSG00000165804 | -0,385 | 3,80E-04 | 2,52E-02 |
| PIEZO2  | ENSG00000154864 | -0,355 | 3,88E-04 | 2,57E-02 |
| STC1    | ENSG00000159167 | -0,462 | 3,91E-04 | 2,58E-02 |
| APOD    | ENSG00000189058 | 0,347  | 4,06E-04 | 2,64E-02 |
| ATAD2   | ENSG00000156802 | 0,366  | 4,10E-04 | 2,64E-02 |
| BUB1    | ENSG00000169679 | -0,310 | 4,11E-04 | 2,64E-02 |
| GNPMB   | ENSG00000136235 | -1,050 | 4,09E-04 | 2,64E-02 |
| NOS1    | ENSG00000089250 | -2,260 | 4,09E-04 | 2,64E-02 |
| PCDH1   | ENSG00000156453 | 0,264  | 4,06E-04 | 2,64E-02 |
| DLL1    | ENSG00000275555 | -0,370 | 4,21E-04 | 2,69E-02 |
| ENOSF1  | ENSG00000132199 | -0,301 | 4,25E-04 | 2,71E-02 |
| TMOD1   | ENSG00000136842 | 0,445  | 4,30E-04 | 2,72E-02 |
| TSPAN8  | ENSG00000127324 | -0,646 | 4,30E-04 | 2,72E-02 |
| CLEC3B  | ENSG00000163815 | -1,195 | 4,35E-04 | 2,74E-02 |
| SLCO2A1 | ENSG00000174640 | -0,674 | 4,36E-04 | 2,74E-02 |
| PLA2G5  | ENSG00000127472 | 1,414  | 4,50E-04 | 2,80E-02 |
| RASSF10 | ENSG00000189431 | -1,470 | 4,49E-04 | 2,80E-02 |
| AMPD3   | ENSG00000133805 | 0,780  | 4,55E-04 | 2,81E-02 |
| LRP12   | ENSG00000147650 | 0,252  | 4,54E-04 | 2,81E-02 |
| CHAF1A  | ENSG00000167670 | 0,466  | 4,61E-04 | 2,83E-02 |
| PRRT2   | ENSG00000167371 | 2,229  | 4,61E-04 | 2,83E-02 |
| HSPB6   | ENSG00000004776 | -0,351 | 4,65E-04 | 2,83E-02 |

|          |                 |        |          |          |
|----------|-----------------|--------|----------|----------|
| WNT9A    | ENSG00000143816 | -0,439 | 4,66E-04 | 2,83E-02 |
| CACHD1   | ENSG00000158966 | 0,277  | 4,80E-04 | 2,91E-02 |
| GSTM2    | ENSG00000213366 | -0,342 | 4,84E-04 | 2,92E-02 |
| CD36     | ENSG00000135218 | -0,760 | 4,87E-04 | 2,93E-02 |
| TNFSF18  | ENSG00000120337 | -0,366 | 5,05E-04 | 3,02E-02 |
| CST1     | ENSG00000170373 | 0,610  | 5,07E-04 | 3,02E-02 |
| KCNN4    | ENSG00000104783 | -0,792 | 5,12E-04 | 3,04E-02 |
| SHE      | ENSG00000169291 | -0,219 | 5,15E-04 | 3,05E-02 |
| DUSP4    | ENSG00000120875 | -0,261 | 5,23E-04 | 3,09E-02 |
| CENPBD1  | ENSG00000177946 | 0,199  | 5,36E-04 | 3,14E-02 |
| TM7SF2   | ENSG00000149809 | -0,335 | 5,35E-04 | 3,14E-02 |
| HSPB8    | ENSG00000152137 | 0,334  | 5,44E-04 | 3,18E-02 |
| IGFBP1   | ENSG00000146678 | -0,582 | 5,65E-04 | 3,27E-02 |
| UBE2L6   | ENSG00000156587 | 0,205  | 5,64E-04 | 3,27E-02 |
| SYT7     | ENSG00000011347 | -0,953 | 5,70E-04 | 3,29E-02 |
| SLC15A3  | ENSG00000110446 | 0,327  | 5,73E-04 | 3,29E-02 |
| ZFPM2    | ENSG00000169946 | 0,369  | 5,92E-04 | 3,39E-02 |
| CDC20    | ENSG00000117399 | -0,386 | 6,03E-04 | 3,44E-02 |
| ANKRD44  | ENSG00000065413 | -0,767 | 6,07E-04 | 3,45E-02 |
| NTSR1    | ENSG00000101188 | -0,347 | 6,10E-04 | 3,46E-02 |
| DNAH11   | ENSG00000105877 | 0,366  | 6,21E-04 | 3,50E-02 |
| CLSPN    | ENSG00000092853 | 0,378  | 6,31E-04 | 3,55E-02 |
| FAM221A  | ENSG00000188732 | -0,310 | 6,40E-04 | 3,55E-02 |
| PIK3R3   | ENSG00000117461 | -0,311 | 6,35E-04 | 3,55E-02 |
| PLSCR1   | ENSG00000188313 | 0,208  | 6,38E-04 | 3,55E-02 |
| RTN4RL1  | ENSG00000185924 | -2,401 | 6,39E-04 | 3,55E-02 |
| BDKRB2   | ENSG00000168398 | 0,651  | 6,48E-04 | 3,55E-02 |
| CDC25B   | ENSG00000101224 | -0,240 | 6,46E-04 | 3,55E-02 |
| MOBP     | ENSG00000168314 | 0,795  | 6,44E-04 | 3,55E-02 |
| NFIA     | ENSG00000162599 | -0,403 | 6,63E-04 | 3,63E-02 |
| GIMAP8   | ENSG00000171115 | -0,227 | 6,76E-04 | 3,68E-02 |
| PARD6A   | ENSG00000102981 | -0,362 | 6,88E-04 | 3,74E-02 |
| ADGRF3   | ENSG00000173567 | 2,256  | 7,00E-04 | 3,78E-02 |
| PSMB8    | ENSG00000230669 | 0,220  | 7,14E-04 | 3,85E-02 |
| CCL23    | ENSG00000276114 | -0,826 | 7,24E-04 | 3,88E-02 |
| RASGRF2  | ENSG00000113319 | 0,347  | 7,24E-04 | 3,88E-02 |
| C1orf115 | ENSG00000162817 | -0,180 | 7,31E-04 | 3,90E-02 |
| NUAK1    | ENSG00000074590 | 0,442  | 7,38E-04 | 3,93E-02 |
| AUNIP    | ENSG00000127423 | 0,412  | 7,58E-04 | 4,00E-02 |
| FSTL3    | ENSG00000070404 | 0,289  | 7,58E-04 | 4,00E-02 |
| ARSK     | ENSG00000164291 | 0,211  | 7,70E-04 | 4,04E-02 |
| MXD3     | ENSG00000213347 | -0,387 | 7,69E-04 | 4,04E-02 |
| CLEC1A   | ENSG00000150048 | 0,182  | 7,77E-04 | 4,06E-02 |
| HTR2B    | ENSG00000135914 | -0,366 | 8,16E-04 | 4,25E-02 |
| BTD      | ENSG00000169814 | -0,185 | 8,29E-04 | 4,29E-02 |
| TCN2     | ENSG00000185339 | -0,295 | 8,26E-04 | 4,29E-02 |
| TSPAN5   | ENSG00000168785 | -0,178 | 8,41E-04 | 4,34E-02 |
| CIT      | ENSG00000122966 | -0,302 | 8,70E-04 | 4,48E-02 |
| ZDHHC13  | ENSG00000177054 | -0,211 | 8,97E-04 | 4,60E-02 |
| ACKR4    | ENSG00000129048 | -0,454 | 9,16E-04 | 4,63E-02 |
| ARL14EPL | ENSG00000268223 | -0,995 | 9,21E-04 | 4,63E-02 |
| MATN2    | ENSG00000132561 | -0,529 | 9,21E-04 | 4,63E-02 |
| PDE1C    | ENSG00000154678 | 0,280  | 9,17E-04 | 4,63E-02 |

|          |                 |        |          |          |
|----------|-----------------|--------|----------|----------|
| RGS2     | ENSG00000116741 | 0,398  | 9,15E-04 | 4,63E-02 |
| SULF1    | ENSG00000137573 | -0,443 | 9,12E-04 | 4,63E-02 |
| CYP51A1  | ENSG00000001630 | -0,193 | 9,28E-04 | 4,65E-02 |
| ARHGEF26 | ENSG00000277101 | 0,351  | 9,35E-04 | 4,67E-02 |
| TUBB2B   | ENSG00000137285 | 0,445  | 9,73E-04 | 4,84E-02 |
| BTG2     | ENSG00000159388 | -0,190 | 9,94E-04 | 4,93E-02 |



**Supplementary Table S7: Genes upregulated by LPS exclusively in cells that do not express APEX1(1-20).** To identify genes upregulated by LPS specifically in cells transduced with the empty virus, but not in cells expressing moderate levels of APEX1(1-20), the results of the DGE analysis of both cells populations after treatment with detoxified (con) or active LPS (LPS) were combined. The L2FC (Log 2-fold change) states the average difference in gene expression between both treatments, positive values denote upregulation by LPS treatment. Wald test from DESeq2 was used to calculate the significance of the change in the expression. The adjusted p-values take the number of tested genes into account, the threshold for the adjusted p-value was 0.05. Mean expression levels per sample group are stated in transcripts per million (TPM), calculated during quasi-mapping with the tool salmon. The list is sorted by gene expression.

| gene name | L2FC  | adjusted p-value | mean TPM empty virus con | mean TPM empty virus LPS | mean TPM APEX1(1-20) con | mean TPM APEX1(1-20) LPS |
|-----------|-------|------------------|--------------------------|--------------------------|--------------------------|--------------------------|
| FTH1      | 0,268 | 4,30E-03         | 4639,36                  | 5565,16                  | 4723,13                  | 5429,98                  |
| SERPINE1  | 0,263 | 3,91E-02         | 2753,76                  | 3306,84                  | 2860,91                  | 3352,05                  |
| SAT1      | 0,334 | 2,28E-02         | 372,10                   | 468,58                   | 420,02                   | 491,31                   |
| RNASEK    | 0,259 | 4,27E-02         | 302,79                   | 362,46                   | 319,66                   | 347,36                   |
| GDF15     | 0,428 | 4,16E-03         | 181,22                   | 243,01                   | 186,96                   | 225,56                   |
| TAX1BP3   | 0,221 | 4,42E-02         | 166,16                   | 193,15                   | 174,50                   | 184,39                   |
| COTL1     | 0,280 | 6,99E-03         | 165,55                   | 200,62                   | 173,08                   | 192,33                   |
| COL4A2    | 0,432 | 2,82E-02         | 148,83                   | 198,87                   | 156,04                   | 201,24                   |
| PSME1     | 0,266 | 4,11E-03         | 147,10                   | 176,17                   | 153,10                   | 168,61                   |
| PSME2     | 0,443 | 8,81E-05         | 134,36                   | 181,67                   | 140,36                   | 171,61                   |
| RRAS      | 0,247 | 4,42E-02         | 128,19                   | 152,15                   | 131,01                   | 143,27                   |
| HLA-C     | 0,313 | 8,89E-03         | 120,68                   | 149,68                   | 127,87                   | 149,23                   |
| MT1L      | 0,355 | 1,88E-02         | 119,01                   | 151,73                   | 116,61                   | 144,39                   |
| IER3      | 0,270 | 7,20E-03         | 100,45                   | 120,93                   | 107,70                   | 115,41                   |
| ATP5F1D   | 0,341 | 1,18E-02         | 92,26                    | 116,67                   | 100,23                   | 97,38                    |
| MFAP2     | 0,276 | 5,43E-03         | 70,80                    | 85,75                    | 75,64                    | 78,59                    |
| CYSTM1    | 0,205 | 4,95E-02         | 68,11                    | 78,37                    | 68,82                    | 69,97                    |
| SPHK1     | 0,285 | 2,16E-02         | 64,57                    | 78,63                    | 65,73                    | 71,53                    |
| PDXK      | 0,284 | 4,22E-02         | 63,89                    | 77,58                    | 69,04                    | 72,86                    |
| STYXL1    | 0,217 | 4,92E-02         | 55,70                    | 64,54                    | 53,68                    | 57,32                    |
| BPGM      | 0,259 | 1,57E-02         | 47,34                    | 56,61                    | 48,03                    | 56,46                    |
| PLCG1     | 0,243 | 5,56E-04         | 46,66                    | 55,06                    | 50,10                    | 50,59                    |
| NFKBIA    | 0,272 | 5,05E-03         | 44,13                    | 53,19                    | 48,70                    | 53,45                    |
| P4HA2     | 0,217 | 3,84E-02         | 41,12                    | 47,65                    | 40,49                    | 44,88                    |
| ISG15     | 0,345 | 1,23E-02         | 40,32                    | 51,21                    | 43,32                    | 50,22                    |
| SERPINB9  | 0,176 | 2,04E-02         | 40,12                    | 45,26                    | 43,72                    | 46,50                    |
| DPP3      | 0,281 | 5,75E-03         | 39,09                    | 47,59                    | 39,50                    | 45,15                    |
| CXCR4     | 0,237 | 1,68E-02         | 37,57                    | 44,12                    | 36,06                    | 41,30                    |
| TSPAN13   | 0,390 | 8,14E-04         | 36,14                    | 47,46                    | 38,66                    | 43,40                    |
| BST2      | 0,315 | 7,15E-04         | 35,86                    | 44,46                    | 37,59                    | 42,84                    |
| SIPA1     | 0,279 | 3,13E-02         | 32,32                    | 39,17                    | 34,52                    | 35,80                    |
| TMEM132A  | 0,351 | 6,18E-03         | 31,27                    | 39,93                    | 34,67                    | 35,67                    |
| POLD4     | 0,346 | 3,42E-02         | 28,60                    | 36,48                    | 29,78                    | 31,91                    |
| UPP1      | 0,232 | 1,96E-02         | 28,15                    | 32,94                    | 27,23                    | 31,38                    |
| GMPPA     | 0,312 | 1,03E-02         | 28,14                    | 34,92                    | 28,84                    | 32,19                    |
| PSMB10    | 0,328 | 2,68E-03         | 27,59                    | 34,55                    | 28,71                    | 32,02                    |
| YPEL3     | 0,217 | 4,54E-02         | 26,38                    | 30,64                    | 29,57                    | 28,61                    |
| GSDMD     | 0,274 | 6,99E-03         | 25,96                    | 31,39                    | 27,55                    | 29,02                    |
| FHL3      | 0,276 | 3,00E-02         | 25,68                    | 31,13                    | 27,18                    | 29,16                    |
| PLTP      | 0,355 | 5,67E-03         | 25,47                    | 32,76                    | 27,27                    | 31,30                    |
| MARCHF2   | 0,189 | 4,89E-02         | 23,89                    | 27,20                    | 26,73                    | 24,84                    |
| TMEM54    | 0,266 | 8,15E-03         | 23,67                    | 28,40                    | 25,16                    | 25,07                    |
| NUDT22    | 0,284 | 3,13E-02         | 22,84                    | 27,79                    | 24,16                    | 24,80                    |
| TNFRSF21  | 0,172 | 3,10E-02         | 22,78                    | 25,62                    | 24,02                    | 26,02                    |
| UBR4      | 0,376 | 1,12E-02         | 22,72                    | 29,57                    | 22,32                    | 25,97                    |

|          |       |          |       |       |       |       |
|----------|-------|----------|-------|-------|-------|-------|
| ANKH     | 0,290 | 8,12E-03 | 22,47 | 27,49 | 22,50 | 24,26 |
| GRASP    | 0,197 | 5,05E-03 | 22,21 | 25,48 | 23,13 | 23,42 |
| AGRN     | 0,368 | 1,28E-02 | 21,33 | 27,78 | 21,89 | 26,02 |
| MOV10    | 0,221 | 4,78E-02 | 20,49 | 23,73 | 21,01 | 20,55 |
| FBLN5    | 0,404 | 1,15E-02 | 19,17 | 25,33 | 21,56 | 26,50 |
| TSSC4    | 0,419 | 1,28E-02 | 18,98 | 25,48 | 19,43 | 19,63 |
| TCIRG1   | 0,271 | 1,43E-02 | 18,05 | 21,85 | 19,29 | 20,30 |
| EML2     | 0,311 | 1,35E-02 | 17,59 | 21,82 | 19,57 | 18,49 |
| SURF1    | 0,234 | 9,64E-03 | 17,51 | 20,53 | 18,53 | 18,21 |
| RSAD1    | 0,197 | 1,18E-02 | 16,94 | 19,36 | 17,55 | 18,60 |
| CCS      | 0,222 | 3,81E-02 | 16,90 | 19,69 | 17,92 | 17,70 |
| GBGT1    | 0,343 | 1,72E-02 | 16,83 | 21,36 | 17,33 | 19,51 |
| SLC35C2  | 0,269 | 1,84E-02 | 16,83 | 20,30 | 17,60 | 18,66 |
| CHKB     | 0,197 | 3,40E-02 | 16,68 | 19,04 | 17,40 | 17,25 |
| LIG1     | 0,274 | 1,63E-02 | 16,52 | 19,88 | 15,96 | 18,60 |
| SDC4     | 0,352 | 6,93E-04 | 16,38 | 20,79 | 17,77 | 19,54 |
| STARD10  | 0,569 | 4,79E-07 | 16,35 | 24,40 | 18,98 | 22,60 |
| SLC38A5  | 0,391 | 1,91E-02 | 16,17 | 21,13 | 18,27 | 19,16 |
| MAP1LC3A | 0,328 | 1,88E-02 | 15,91 | 19,99 | 17,73 | 18,79 |
| LRFN4    | 0,375 | 9,94E-04 | 15,46 | 19,96 | 17,12 | 17,34 |
| APOL1    | 0,388 | 1,24E-06 | 14,89 | 19,46 | 17,09 | 18,97 |
| CAMTA2   | 0,290 | 3,88E-03 | 14,70 | 17,96 | 13,71 | 15,09 |
| CRTAC1   | 0,499 | 2,49E-05 | 14,63 | 20,56 | 15,89 | 19,72 |
| YIPF1    | 0,223 | 4,62E-02 | 14,38 | 16,72 | 14,35 | 15,65 |
| MICAL1   | 0,209 | 4,27E-02 | 14,02 | 16,23 | 14,04 | 15,16 |
| TNFRSF6B | 0,338 | 4,52E-03 | 13,87 | 17,58 | 14,85 | 15,80 |
| JUNB     | 0,259 | 1,57E-02 | 13,62 | 16,41 | 14,14 | 15,42 |
| SBNO2    | 0,304 | 4,92E-02 | 13,55 | 16,80 | 14,23 | 16,14 |
| NFATC4   | 0,371 | 1,94E-02 | 13,55 | 17,33 | 16,04 | 14,90 |
| C6orf136 | 0,223 | 4,04E-02 | 13,28 | 15,48 | 12,90 | 13,51 |
| POLD1    | 0,320 | 2,33E-02 | 12,27 | 15,26 | 12,21 | 14,22 |
| B3GAT3   | 0,247 | 4,92E-02 | 12,23 | 14,49 | 12,50 | 13,71 |
| GALT     | 0,230 | 2,51E-02 | 12,15 | 14,22 | 13,09 | 13,54 |
| PTK7     | 0,269 | 4,49E-03 | 12,13 | 14,54 | 12,75 | 13,40 |
| CCDC28B  | 0,254 | 2,57E-02 | 11,16 | 13,29 | 11,61 | 12,56 |
| TAP2     | 0,212 | 5,00E-02 | 10,59 | 12,21 | 10,79 | 11,33 |
| TNFRSF14 | 0,388 | 1,03E-03 | 10,32 | 13,55 | 11,52 | 13,07 |
| IFITM1   | 0,366 | 2,77E-03 | 10,28 | 13,27 | 11,68 | 13,46 |
| TMC6     | 0,276 | 2,09E-02 | 9,99  | 12,12 | 10,48 | 11,78 |
| CBR3     | 0,357 | 1,62E-03 | 9,82  | 12,53 | 10,15 | 11,75 |
| FBXW4    | 0,228 | 4,15E-02 | 9,73  | 11,36 | 10,21 | 10,78 |
| FANCG    | 0,345 | 3,94E-02 | 9,48  | 12,03 | 9,66  | 10,17 |
| SLC7A7   | 0,298 | 1,68E-02 | 9,01  | 11,09 | 9,71  | 10,53 |
| ITPKC    | 0,230 | 3,23E-02 | 8,88  | 10,40 | 9,02  | 9,99  |
| MFSD3    | 0,235 | 3,15E-02 | 8,42  | 9,89  | 8,93  | 8,74  |
| SP110    | 0,241 | 3,43E-02 | 8,34  | 9,85  | 8,64  | 9,84  |
| IRF9     | 0,498 | 1,26E-03 | 8,34  | 11,68 | 8,74  | 10,84 |
| SIRT3    | 0,207 | 3,55E-02 | 8,30  | 9,56  | 8,63  | 8,25  |
| UBA7     | 0,446 | 6,02E-06 | 7,69  | 10,51 | 8,69  | 10,17 |
| TREX1    | 0,275 | 2,37E-02 | 7,35  | 8,84  | 7,15  | 8,25  |
| IL3RA    | 0,238 | 2,67E-02 | 7,32  | 8,63  | 8,49  | 8,64  |
| PARP10   | 0,319 | 1,05E-02 | 7,31  | 9,12  | 7,17  | 8,69  |
| SLC27A3  | 0,380 | 1,86E-02 | 7,02  | 9,15  | 7,23  | 8,06  |

|          |       |          |      |       |      |      |
|----------|-------|----------|------|-------|------|------|
| ULBP2    | 0,338 | 1,95E-03 | 6,99 | 8,81  | 7,68 | 8,43 |
| C19orf47 | 0,357 | 2,99E-02 | 6,93 | 8,83  | 7,20 | 8,14 |
| ARHGAP4  | 0,214 | 4,48E-02 | 6,92 | 8,02  | 7,26 | 6,77 |
| RELB     | 0,353 | 9,55E-03 | 6,79 | 8,68  | 7,33 | 7,87 |
| MS4A6A   | 0,466 | 5,66E-03 | 6,75 | 9,31  | 6,92 | 8,42 |
| LAMB3    | 0,446 | 2,35E-03 | 6,66 | 9,08  | 6,82 | 7,85 |
| SOCS3    | 0,302 | 1,15E-02 | 6,29 | 7,77  | 6,34 | 7,05 |
| AMDHD2   | 0,275 | 3,56E-02 | 6,18 | 7,50  | 6,51 | 7,01 |
| ARSA     | 0,292 | 1,15E-02 | 6,12 | 7,50  | 6,64 | 7,17 |
| TCEAL7   | 0,328 | 5,88E-03 | 6,06 | 7,61  | 7,03 | 7,48 |
| PMM1     | 0,341 | 1,30E-02 | 5,47 | 6,91  | 5,80 | 6,62 |
| RPS6KL1  | 0,352 | 4,35E-03 | 5,18 | 6,57  | 6,25 | 6,57 |
| APOBEC3G | 0,249 | 2,89E-02 | 5,17 | 6,13  | 5,50 | 6,00 |
| SAMD14   | 0,369 | 6,93E-04 | 5,09 | 6,59  | 5,72 | 6,44 |
| E2F1     | 0,419 | 2,20E-02 | 5,08 | 6,74  | 5,14 | 6,70 |
| RND1     | 0,401 | 6,28E-03 | 4,89 | 6,53  | 5,96 | 7,31 |
| MTMR11   | 0,364 | 1,27E-03 | 4,50 | 5,80  | 4,61 | 5,11 |
| PLCG2    | 1,263 | 8,65E-05 | 4,47 | 10,93 | 6,94 | 9,00 |
| GFPT2    | 0,367 | 1,51E-02 | 4,46 | 5,74  | 4,86 | 6,11 |
| PAQR7    | 0,277 | 1,42E-04 | 4,36 | 5,28  | 4,58 | 4,75 |
| BLOC1S3  | 0,447 | 2,87E-02 | 4,25 | 5,83  | 5,33 | 4,58 |
| NUDT18   | 0,274 | 3,86E-02 | 4,17 | 5,03  | 4,43 | 4,75 |
| RASD1    | 0,316 | 7,60E-03 | 4,10 | 5,11  | 4,04 | 4,80 |
| ANKRD55  | 0,227 | 4,07E-02 | 3,96 | 4,62  | 4,03 | 4,54 |
| CERS1    | 0,381 | 4,90E-04 | 3,71 | 4,83  | 3,84 | 4,15 |
| PLEKHA4  | 0,272 | 3,51E-02 | 3,61 | 4,37  | 3,79 | 4,16 |
| TAPBPL   | 0,812 | 1,61E-04 | 3,35 | 5,70  | 4,36 | 4,51 |
| SLC1A4   | 0,234 | 8,33E-03 | 3,22 | 3,78  | 3,42 | 3,70 |
| CPLANE2  | 0,390 | 3,83E-03 | 3,18 | 4,17  | 3,23 | 3,57 |
| SEMA3G   | 0,417 | 2,76E-04 | 3,17 | 4,24  | 3,57 | 4,37 |
| CFAP410  | 0,304 | 3,05E-02 | 3,16 | 3,91  | 3,60 | 3,41 |
| GBP4     | 0,310 | 9,61E-03 | 3,06 | 3,80  | 3,21 | 3,55 |
| ACBD4    | 0,278 | 1,93E-02 | 2,93 | 3,55  | 3,31 | 3,18 |
| CEBPD    | 0,785 | 1,63E-06 | 2,89 | 5,00  | 3,62 | 4,84 |
| ACSS1    | 0,279 | 1,11E-04 | 2,85 | 3,45  | 2,97 | 3,29 |
| RASA4    | 0,440 | 5,93E-04 | 2,80 | 3,81  | 3,00 | 3,68 |
| IL27RA   | 0,362 | 1,14E-03 | 2,67 | 3,43  | 2,87 | 3,38 |
| AMPH     | 0,488 | 6,61E-03 | 2,65 | 3,70  | 3,11 | 4,11 |
| IRF7     | 0,301 | 4,14E-02 | 2,59 | 3,20  | 2,64 | 3,21 |
| ASPHD2   | 0,209 | 3,21E-02 | 2,57 | 2,97  | 2,85 | 3,03 |
| DENND2B  | 0,984 | 5,79E-06 | 2,56 | 4,92  | 3,05 | 3,49 |
| PIK3CD   | 0,296 | 2,16E-02 | 2,54 | 3,14  | 2,75 | 3,18 |
| SIK1B    | 0,287 | 4,26E-02 | 2,53 | 3,07  | 2,62 | 2,94 |
| TMEM121  | 0,381 | 2,69E-03 | 2,44 | 3,17  | 2,82 | 2,99 |
| C2CD4B   | 0,558 | 2,54E-02 | 2,43 | 3,57  | 2,65 | 3,46 |
| TYMP     | 0,669 | 3,16E-02 | 2,16 | 3,43  | 3,14 | 3,38 |
| FAHD2CP  | 0,381 | 2,59E-03 | 2,10 | 2,73  | 2,39 | 2,42 |
| DHX58    | 0,330 | 2,91E-02 | 2,01 | 2,53  | 2,18 | 2,56 |
| C11orf96 | 0,453 | 5,30E-04 | 1,98 | 2,72  | 2,22 | 2,34 |
| VWA1     | 0,476 | 8,05E-07 | 1,95 | 2,71  | 2,18 | 2,54 |
| RBPMS2   | 0,311 | 4,99E-02 | 1,84 | 2,28  | 1,97 | 2,08 |
| SYNGR3   | 0,367 | 5,43E-03 | 1,82 | 2,36  | 2,02 | 2,27 |
| ATOH8    | 0,364 | 2,02E-02 | 1,80 | 2,32  | 1,95 | 2,21 |

|            |       |          |      |      |      |      |
|------------|-------|----------|------|------|------|------|
| ARHGEF19   | 0,356 | 2,64E-04 | 1,59 | 2,04 | 1,71 | 1,88 |
| TGFBR3L    | 0,467 | 6,18E-03 | 1,51 | 2,09 | 1,60 | 1,69 |
| LRRC3      | 0,273 | 3,05E-02 | 1,31 | 1,58 | 1,35 | 1,52 |
| RASA4B     | 0,567 | 1,42E-04 | 1,29 | 1,90 | 1,43 | 1,79 |
| ZBTB42     | 0,284 | 1,87E-02 | 1,28 | 1,55 | 1,37 | 1,51 |
| HSD3B7     | 0,300 | 4,42E-02 | 1,21 | 1,50 | 1,34 | 1,44 |
| ITPRIPL1   | 0,456 | 3,55E-02 | 1,08 | 1,48 | 1,41 | 1,49 |
| B3GALT4    | 0,398 | 5,43E-03 | 0,99 | 1,30 | 1,03 | 1,16 |
| CX3CL1     | 0,553 | 1,96E-03 | 0,93 | 1,37 | 1,30 | 1,38 |
| FMNL1      | 0,395 | 1,74E-02 | 0,93 | 1,23 | 1,10 | 1,15 |
| AC005363.1 | 6,479 | 3,18E-02 | 0,89 | 3,89 | 2,74 | 2,46 |
| ASPHD1     | 0,680 | 3,55E-02 | 0,87 | 1,41 | 1,44 | 1,44 |
| CPAMD8     | 0,499 | 1,88E-02 | 0,77 | 1,10 | 0,82 | 0,96 |
| FXYD6      | 0,656 | 9,95E-04 | 0,75 | 1,19 | 0,96 | 1,14 |
| ODF3B      | 0,753 | 2,04E-02 | 0,74 | 1,25 | 0,82 | 1,21 |
| MROH6      | 0,678 | 1,94E-02 | 0,69 | 1,10 | 1,10 | 0,90 |
| ADM2       | 0,487 | 2,59E-02 | 0,65 | 0,91 | 0,65 | 0,81 |
| FXYD2      | 0,734 | 1,43E-02 | 0,63 | 1,04 | 0,67 | 0,79 |
| BATF3      | 0,662 | 2,60E-02 | 0,63 | 0,99 | 0,73 | 0,85 |
| SLC22A31   | 0,695 | 3,88E-03 | 0,58 | 0,93 | 0,79 | 0,87 |
| MELTF      | 0,373 | 3,00E-02 | 0,55 | 0,71 | 0,61 | 0,69 |
| PLEKHN1    | 0,492 | 1,74E-02 | 0,54 | 0,76 | 0,52 | 0,70 |
| TPPP3      | 0,496 | 2,61E-02 | 0,54 | 0,75 | 0,51 | 0,70 |
| CDK20      | 0,409 | 3,22E-02 | 0,53 | 0,71 | 0,58 | 0,63 |
| ACTL10     | 0,358 | 3,23E-02 | 0,50 | 0,64 | 0,54 | 0,56 |
| HOXB9      | 0,395 | 1,14E-02 | 0,49 | 0,65 | 0,48 | 0,58 |
| ADGRB2     | 0,324 | 2,01E-02 | 0,47 | 0,59 | 0,50 | 0,57 |
| MCTP2      | 0,553 | 4,12E-02 | 0,44 | 0,64 | 0,58 | 0,53 |
| ST6GALNAC2 | 0,756 | 1,60E-02 | 0,37 | 0,63 | 0,46 | 0,53 |
| CDH15      | 0,509 | 1,57E-02 | 0,36 | 0,52 | 0,40 | 0,51 |
| EFNA2      | 0,374 | 2,30E-02 | 0,34 | 0,44 | 0,39 | 0,39 |
| JAK3       | 0,743 | 1,86E-05 | 0,33 | 0,56 | 0,40 | 0,55 |
| C17orf107  | 0,459 | 4,81E-03 | 0,32 | 0,43 | 0,35 | 0,44 |
| S1PR2      | 0,346 | 3,55E-02 | 0,29 | 0,37 | 0,33 | 0,37 |
| NCKAP5     | 0,847 | 1,35E-02 | 0,27 | 0,49 | 0,33 | 0,50 |
| NMNAT2     | 0,987 | 1,77E-02 | 0,21 | 0,41 | 0,27 | 0,35 |
| PRRX1      | 1,003 | 4,54E-02 | 0,18 | 0,35 | 0,25 | 0,39 |
| GXYLT2     | 1,226 | 2,85E-04 | 0,16 | 0,38 | 0,22 | 0,39 |
| CLDN14     | 0,877 | 3,35E-03 | 0,15 | 0,28 | 0,20 | 0,25 |
| CHST6      | 0,461 | 3,30E-02 | 0,15 | 0,21 | 0,15 | 0,21 |
| SNX22      | 0,983 | 6,88E-03 | 0,14 | 0,29 | 0,16 | 0,18 |
| ACHE       | 0,801 | 4,26E-03 | 0,13 | 0,23 | 0,14 | 0,22 |
| IL11       | 0,997 | 8,34E-03 | 0,10 | 0,21 | 0,12 | 0,18 |
| PTGES3L    | 1,020 | 1,79E-02 | 0,10 | 0,20 | 0,15 | 0,16 |
| PLA1A      | 1,472 | 1,66E-06 | 0,10 | 0,27 | 0,14 | 0,24 |
| C1S        | 1,036 | 4,83E-02 | 0,09 | 0,17 | 0,15 | 0,20 |
| BEST1      | 3,000 | 3,23E-02 | 0,08 | 0,53 | 0,13 | 0,17 |
| THBS2      | 0,836 | 1,44E-02 | 0,08 | 0,14 | 0,13 | 0,14 |
| HAS2       | 1,050 | 6,88E-03 | 0,07 | 0,15 | 0,08 | 0,14 |
| LRG1       | 0,915 | 3,23E-02 | 0,07 | 0,13 | 0,11 | 0,13 |
| MAP6       | 0,992 | 5,88E-03 | 0,07 | 0,14 | 0,08 | 0,09 |
| RAB7B      | 1,191 | 6,46E-03 | 0,05 | 0,12 | 0,08 | 0,10 |
| RPL23AP87  | 2,313 | 3,21E-02 | 0,04 | 0,13 | 0,10 | 0,09 |

|            |        |          |      |      |      |      |
|------------|--------|----------|------|------|------|------|
| ADAM12     | 1,044  | 5,51E-03 | 0,04 | 0,08 | 0,04 | 0,07 |
| MX2        | 2,548  | 8,60E-07 | 0,02 | 0,13 | 0,08 | 0,13 |
| AL358472.7 | 20,830 | 1,46E-05 | 0,00 | 0,08 | 0,15 | 0,14 |

**Supplementary Table S8: Genes downregulated by LPS exclusively in cells that do not express APEX1(1-20).** To identify genes downregulated by LPS specifically in cells transduced with the empty virus, but not in cells expressing moderate levels of APEX1(1-20), the results of the DGE analysis of both cells populations after treatment with detoxified (con) or active LPS (LPS) were combined. The L2FC (Log 2-fold change) states the average difference in gene expression between both treatments, negative values denote downregulation by LPS treatment. Wald test from DESeq2 was used to calculate the significance of the change in the expression. The adjusted p-values take the number of tested genes into account, the threshold for the adjusted p-value was 0.05. Mean expression levels per sample group are stated in transcripts per million (TPM), calculated during quasi-mapping with the tool salmon. The list is sorted by gene expression.

| gene name | L2FC   | adjusted p-value | mean TPM empty virus con | mean TPM empty virus LPS | mean TPM APEX1(1-20) con | mean TPM APEX1(1-20) LPS |
|-----------|--------|------------------|--------------------------|--------------------------|--------------------------|--------------------------|
| RGS5      | -0,291 | 4,54E-02         | 1386,54                  | 1138,17                  | 1251,47                  | 1178,35                  |
| MMRN1     | -0,492 | 2,43E-02         | 888,40                   | 637,40                   | 859,18                   | 699,02                   |
| VAPA      | -0,205 | 3,21E-03         | 313,94                   | 271,48                   | 297,11                   | 303,08                   |
| CKS2      | -0,336 | 8,89E-03         | 287,78                   | 228,74                   | 288,97                   | 258,79                   |
| PTTG1     | -0,362 | 3,05E-02         | 285,06                   | 221,31                   | 276,16                   | 228,63                   |
| NUCKS1    | -0,368 | 3,27E-04         | 284,56                   | 220,50                   | 261,59                   | 233,58                   |
| CNN3      | -0,234 | 1,04E-02         | 273,16                   | 231,87                   | 274,05                   | 257,51                   |
| CAPN2     | -0,289 | 2,95E-06         | 260,46                   | 212,68                   | 252,84                   | 228,05                   |
| PDCD6IP   | -0,363 | 9,81E-04         | 189,22                   | 147,31                   | 181,29                   | 183,72                   |
| IGF2BP3   | -0,313 | 3,19E-02         | 182,15                   | 146,90                   | 163,66                   | 171,08                   |
| ARL6IP1   | -0,280 | 1,03E-02         | 162,45                   | 133,86                   | 160,85                   | 137,37                   |
| SNX6      | -0,454 | 3,97E-02         | 159,65                   | 118,82                   | 151,27                   | 147,95                   |
| MCFD2     | -0,277 | 7,05E-04         | 157,06                   | 129,31                   | 155,90                   | 143,20                   |
| IPO5      | -0,156 | 2,63E-02         | 149,62                   | 133,94                   | 146,54                   | 145,32                   |
| LAMP2     | -0,141 | 3,91E-02         | 147,87                   | 133,68                   | 145,02                   | 147,45                   |
| PTK2      | -0,273 | 4,98E-02         | 145,61                   | 121,03                   | 138,06                   | 135,72                   |
| ARHGAP29  | -0,385 | 4,42E-02         | 141,45                   | 109,71                   | 132,43                   | 135,02                   |
| HP1BP3    | -0,314 | 1,81E-02         | 139,47                   | 112,32                   | 131,88                   | 120,54                   |
| RGS4      | -0,258 | 5,00E-02         | 114,80                   | 95,98                    | 117,02                   | 111,04                   |
| PRRC2B    | -0,252 | 3,23E-02         | 112,97                   | 94,70                    | 107,19                   | 104,11                   |
| CKAP5     | -0,220 | 1,40E-02         | 107,89                   | 92,55                    | 102,33                   | 94,75                    |
| VPS26A    | -0,298 | 4,96E-02         | 107,19                   | 87,14                    | 98,37                    | 102,76                   |
| TM7SF3    | -0,245 | 1,94E-02         | 106,30                   | 89,77                    | 104,10                   | 90,06                    |
| AHNAK     | -0,388 | 1,41E-02         | 101,72                   | 77,57                    | 93,38                    | 81,88                    |
| THOC3     | -0,528 | 2,78E-02         | 101,44                   | 70,86                    | 81,58                    | 81,55                    |
| NUDT4B    | -0,160 | 4,73E-02         | 92,42                    | 82,58                    | 90,47                    | 93,70                    |
| FAM114A1  | -0,168 | 4,83E-02         | 92,21                    | 81,82                    | 91,47                    | 90,41                    |
| ELK3      | -0,267 | 3,36E-02         | 91,79                    | 76,37                    | 93,11                    | 78,44                    |
| FLI1      | -0,212 | 3,98E-02         | 90,93                    | 78,68                    | 90,90                    | 82,08                    |
| MAPK1     | -0,294 | 1,72E-02         | 88,64                    | 72,59                    | 86,09                    | 85,87                    |
| SULT1B1   | -0,498 | 7,96E-03         | 86,27                    | 62,34                    | 85,35                    | 79,53                    |
| RAB14     | -0,247 | 2,01E-03         | 85,29                    | 71,61                    | 83,80                    | 80,96                    |
| DLGAP5    | -0,621 | 7,41E-06         | 84,10                    | 55,05                    | 72,73                    | 62,97                    |
| KPNA1     | -0,182 | 4,83E-02         | 80,12                    | 70,56                    | 80,77                    | 79,17                    |
| TMPO      | -0,320 | 1,16E-03         | 79,02                    | 63,21                    | 73,14                    | 75,58                    |
| AGFG1     | -0,166 | 3,60E-02         | 78,64                    | 69,89                    | 77,52                    | 78,78                    |
| PRR11     | -0,326 | 5,24E-05         | 74,01                    | 58,87                    | 71,40                    | 62,27                    |
| ARHGAP17  | -0,465 | 2,43E-02         | 71,96                    | 53,09                    | 76,26                    | 67,74                    |
| PTP4A1    | -0,335 | 2,09E-02         | 71,32                    | 56,77                    | 71,78                    | 69,82                    |
| AKT3      | -0,276 | 3,23E-02         | 71,04                    | 58,58                    | 66,66                    | 64,85                    |
| STEAP1B   | -0,254 | 3,71E-02         | 70,66                    | 59,27                    | 73,25                    | 67,94                    |
| FCF1      | -0,213 | 3,43E-02         | 69,65                    | 59,97                    | 67,01                    | 66,79                    |
| PGM2      | -0,220 | 4,75E-02         | 67,65                    | 58,03                    | 64,30                    | 59,35                    |
| NSD2      | -0,239 | 1,18E-02         | 67,24                    | 56,91                    | 65,10                    | 62,85                    |
| TOP2A     | -0,435 | 2,01E-03         | 67,10                    | 49,88                    | 58,96                    | 54,26                    |

|           |        |          |       |       |       |       |
|-----------|--------|----------|-------|-------|-------|-------|
| GLCE      | -0,244 | 3,37E-02 | 66,72 | 56,47 | 67,09 | 61,35 |
| EMCN      | -0,524 | 2,95E-03 | 65,39 | 45,79 | 65,19 | 55,42 |
| STEAP1    | -0,346 | 7,86E-03 | 65,27 | 51,70 | 64,46 | 60,41 |
| CD109     | -0,318 | 4,92E-02 | 63,96 | 51,58 | 63,33 | 60,06 |
| PRKAR2B   | -0,307 | 4,99E-02 | 62,84 | 50,99 | 58,45 | 55,49 |
| MYO5A     | -0,276 | 8,91E-03 | 61,34 | 50,76 | 56,95 | 55,68 |
| MSMO1     | -0,536 | 6,33E-03 | 61,34 | 42,78 | 64,09 | 49,27 |
| CDKN3     | -0,614 | 2,21E-07 | 60,40 | 40,00 | 55,86 | 45,06 |
| DOCK4     | -0,288 | 3,91E-02 | 56,86 | 46,75 | 51,87 | 53,14 |
| NPAS2     | -0,270 | 4,45E-02 | 56,84 | 47,48 | 55,26 | 51,55 |
| ASAP1     | -0,339 | 8,50E-04 | 56,74 | 45,02 | 56,96 | 51,04 |
| CKAP2     | -0,456 | 3,39E-04 | 55,75 | 40,66 | 49,92 | 48,53 |
| SPTLC1P1  | -0,705 | 1,91E-03 | 54,20 | 33,52 | 41,77 | 47,38 |
| UBA6      | -0,346 | 3,56E-02 | 52,07 | 41,00 | 44,69 | 50,22 |
| HNRNPLL   | -0,211 | 2,37E-02 | 51,91 | 44,76 | 50,54 | 49,68 |
| TM4SF18   | -0,366 | 1,12E-02 | 51,79 | 40,24 | 51,66 | 46,59 |
| PIGK      | -0,369 | 8,75E-04 | 51,64 | 40,01 | 46,42 | 47,87 |
| NDE1      | -0,219 | 3,10E-02 | 49,68 | 42,66 | 48,99 | 43,31 |
| CCNA2     | -0,400 | 5,75E-03 | 48,48 | 36,81 | 47,63 | 40,45 |
| MYH10     | -0,217 | 9,83E-03 | 48,08 | 41,28 | 50,00 | 46,94 |
| WDFY3     | -0,381 | 6,18E-03 | 47,37 | 36,63 | 43,32 | 43,83 |
| ARHGAP11A | -0,412 | 1,18E-02 | 46,93 | 35,56 | 40,52 | 42,96 |
| R3HDM1    | -0,468 | 1,00E-03 | 46,32 | 33,74 | 44,19 | 42,73 |
| KNSTRN    | -0,257 | 2,04E-02 | 45,96 | 38,50 | 43,46 | 40,62 |
| CEP55     | -0,538 | 2,21E-04 | 45,55 | 31,76 | 40,39 | 35,62 |
| PBK       | -0,449 | 1,23E-02 | 45,20 | 33,75 | 41,98 | 40,13 |
| ARL5A     | -0,701 | 2,40E-03 | 42,77 | 27,15 | 36,22 | 42,71 |
| SQLE      | -0,304 | 4,39E-02 | 42,63 | 34,49 | 42,79 | 37,29 |
| CCNYL1    | -0,395 | 5,43E-03 | 42,60 | 32,58 | 42,60 | 38,88 |
| DHCR7     | -0,348 | 3,00E-02 | 42,48 | 33,78 | 41,52 | 38,78 |
| NRG1      | -0,397 | 8,48E-03 | 42,39 | 31,95 | 35,24 | 34,48 |
| NUSAP1    | -0,257 | 4,10E-02 | 41,51 | 34,85 | 39,71 | 36,20 |
| GLRX      | -0,240 | 5,05E-03 | 41,14 | 34,71 | 39,91 | 36,15 |
| NUF2      | -0,646 | 2,35E-03 | 39,75 | 25,91 | 35,09 | 30,36 |
| INSIG1    | -0,278 | 5,37E-03 | 37,34 | 30,79 | 38,85 | 33,24 |
| DARS2     | -0,281 | 4,92E-02 | 37,20 | 30,55 | 34,90 | 34,55 |
| SMAD5     | -0,472 | 1,88E-02 | 36,84 | 26,75 | 32,33 | 33,09 |
| ALDH3A2   | -0,186 | 4,27E-02 | 36,02 | 31,66 | 37,27 | 34,20 |
| EFCAB14   | -0,243 | 7,20E-03 | 35,82 | 30,23 | 34,90 | 34,58 |
| LPCAT2    | -0,362 | 5,05E-03 | 35,25 | 27,55 | 35,88 | 32,97 |
| SULT1E1   | -0,482 | 1,43E-02 | 34,24 | 24,97 | 35,22 | 29,34 |
| WASHC5    | -0,200 | 3,11E-02 | 34,07 | 29,64 | 32,50 | 32,76 |
| HMMR      | -0,747 | 7,92E-04 | 33,34 | 20,52 | 27,10 | 24,57 |
| MKI67     | -0,525 | 2,87E-05 | 33,20 | 23,00 | 30,42 | 26,99 |
| RACGAP1   | -0,327 | 2,97E-02 | 32,94 | 26,26 | 30,63 | 28,43 |
| POGLUT3   | -0,247 | 4,29E-02 | 32,88 | 27,71 | 32,13 | 32,03 |
| HIBCH     | -0,436 | 4,24E-03 | 32,79 | 24,29 | 29,19 | 28,38 |
| CENPF     | -0,557 | 7,76E-04 | 32,77 | 22,82 | 24,86 | 24,63 |
| PPP3CA    | -0,232 | 3,15E-02 | 32,64 | 27,74 | 30,29 | 30,65 |
| PHACTR4   | -0,233 | 2,36E-02 | 31,22 | 26,47 | 30,90 | 27,69 |
| NCEH1     | -0,174 | 3,69E-02 | 31,00 | 27,51 | 29,64 | 29,31 |
| SAMHD1    | -0,369 | 3,92E-02 | 30,58 | 23,65 | 26,32 | 30,88 |
| ACER3     | -0,213 | 9,46E-03 | 28,85 | 24,84 | 27,65 | 28,00 |

|             |        |          |       |       |       |       |
|-------------|--------|----------|-------|-------|-------|-------|
| YAP1        | -0,249 | 4,42E-02 | 28,09 | 23,68 | 27,82 | 24,13 |
| RBL2        | -0,287 | 1,74E-02 | 28,00 | 22,97 | 27,75 | 25,92 |
| MEF2A       | -0,344 | 4,52E-02 | 25,86 | 20,49 | 26,06 | 24,22 |
| DIAPH3      | -0,353 | 2,53E-03 | 25,40 | 19,87 | 24,43 | 23,94 |
| QTRT2       | -0,279 | 6,99E-03 | 23,60 | 19,39 | 23,54 | 22,84 |
| MLIP        | -0,301 | 1,12E-02 | 23,51 | 19,05 | 21,92 | 19,99 |
| MTMR10      | -0,375 | 4,79E-04 | 23,37 | 17,98 | 25,88 | 21,54 |
| INCENP      | -0,443 | 6,18E-04 | 23,10 | 17,10 | 21,45 | 22,00 |
| MPHOSPH9    | -0,464 | 6,44E-03 | 23,10 | 16,83 | 19,80 | 20,44 |
| SUV39H2     | -0,517 | 1,93E-02 | 23,08 | 16,34 | 20,77 | 22,76 |
| DEPDC1      | -0,581 | 3,66E-02 | 22,60 | 15,59 | 20,95 | 18,12 |
| FEM1B       | -0,299 | 3,20E-02 | 22,23 | 18,09 | 20,12 | 20,75 |
| CENPA       | -0,407 | 1,53E-03 | 22,03 | 16,54 | 20,40 | 17,89 |
| NEK2        | -0,489 | 1,14E-03 | 22,02 | 15,84 | 19,40 | 16,29 |
| ASPM        | -0,784 | 1,93E-03 | 21,79 | 12,83 | 18,01 | 15,52 |
| HMGCR       | -0,321 | 3,30E-03 | 21,56 | 17,27 | 21,49 | 18,02 |
| AFF1        | -0,327 | 5,05E-03 | 21,49 | 17,22 | 20,68 | 20,16 |
| SPAG5       | -0,278 | 1,44E-02 | 21,35 | 17,53 | 20,53 | 18,15 |
| VPS8        | -0,319 | 3,23E-02 | 21,08 | 16,88 | 19,50 | 18,19 |
| GPSM2       | -0,652 | 2,34E-08 | 20,91 | 13,27 | 19,09 | 15,31 |
| NECTIN3     | -0,470 | 4,92E-03 | 20,80 | 15,17 | 19,88 | 18,09 |
| RMND5A      | -0,187 | 3,74E-02 | 20,62 | 18,11 | 19,45 | 20,02 |
| WASF3       | -0,313 | 1,93E-06 | 20,17 | 16,22 | 20,19 | 17,88 |
| FNBP1       | -0,269 | 1,05E-02 | 19,95 | 16,55 | 20,06 | 18,57 |
| AC087721.2  | -0,375 | 1,11E-03 | 19,71 | 15,18 | 18,38 | 16,98 |
| RNMT        | -0,425 | 6,33E-03 | 18,73 | 14,07 | 17,75 | 17,81 |
| DAW1        | -0,338 | 1,90E-02 | 18,59 | 14,68 | 18,49 | 15,57 |
| APPBP2      | -0,365 | 3,76E-02 | 18,50 | 14,48 | 17,97 | 17,14 |
| LATS2       | -0,211 | 1,24E-02 | 18,14 | 15,67 | 17,89 | 16,95 |
| HSPE1-MOB4  | -0,483 | 1,91E-03 | 18,08 | 12,83 | 14,01 | 17,11 |
| TNRC18      | -0,235 | 3,23E-02 | 17,96 | 15,27 | 16,98 | 16,51 |
| COBLL1      | -0,381 | 1,95E-03 | 17,94 | 13,75 | 18,11 | 18,74 |
| KIF4A       | -0,318 | 6,88E-03 | 17,68 | 14,14 | 16,63 | 14,60 |
| ANGEL2      | -0,371 | 2,33E-02 | 16,97 | 13,21 | 16,56 | 15,22 |
| MEF2C       | -0,347 | 5,59E-03 | 16,44 | 12,92 | 14,48 | 14,42 |
| CEP70       | -0,520 | 1,39E-02 | 16,00 | 11,25 | 14,09 | 12,74 |
| GAS2L3      | -0,436 | 2,59E-02 | 15,94 | 11,94 | 14,95 | 13,15 |
| C2CD2       | -0,279 | 2,28E-02 | 15,93 | 13,14 | 16,95 | 14,32 |
| PIMREG      | -0,446 | 9,83E-03 | 15,83 | 11,56 | 15,40 | 12,08 |
| KNL1        | -0,713 | 6,93E-04 | 15,79 | 9,70  | 13,00 | 12,47 |
| ZNF800      | -0,353 | 1,45E-02 | 15,76 | 12,34 | 15,31 | 14,62 |
| LZTFL1      | -0,296 | 4,42E-02 | 15,70 | 12,77 | 15,16 | 14,56 |
| WASF1       | -0,307 | 1,77E-02 | 14,78 | 11,94 | 15,34 | 14,30 |
| PARPBP      | -0,421 | 4,42E-02 | 14,56 | 11,09 | 13,45 | 13,05 |
| SGO2        | -0,656 | 1,49E-02 | 14,22 | 9,35  | 12,05 | 10,84 |
| DEPDC1B     | -0,341 | 1,19E-03 | 13,96 | 11,04 | 13,50 | 12,07 |
| SENPA       | -0,270 | 2,11E-02 | 13,76 | 11,38 | 12,95 | 13,53 |
| RBBP9       | -0,332 | 8,48E-03 | 13,73 | 10,93 | 14,11 | 13,07 |
| COMMD3-BMI1 | -0,606 | 3,22E-02 | 13,41 | 8,90  | 10,52 | 14,74 |
| DIS3L       | -0,276 | 3,98E-02 | 13,08 | 10,84 | 12,61 | 11,80 |
| OIP5        | -0,352 | 8,05E-03 | 12,74 | 9,96  | 12,37 | 10,39 |
| CRYBG1      | -0,333 | 8,42E-06 | 12,65 | 10,01 | 11,88 | 11,12 |
| MGME1       | -0,250 | 1,42E-03 | 12,53 | 10,52 | 12,16 | 11,54 |



|            |        |          |       |       |       |       |
|------------|--------|----------|-------|-------|-------|-------|
| ZCCHC2     | -0,507 | 1,42E-04 | 12,17 | 8,65  | 11,66 | 9,51  |
| SAMD8      | -0,225 | 4,66E-02 | 12,12 | 10,39 | 12,15 | 11,68 |
| CENPE      | -0,750 | 3,78E-03 | 12,09 | 7,32  | 8,56  | 8,59  |
| APAF1      | -0,294 | 3,35E-03 | 10,95 | 8,93  | 10,43 | 10,60 |
| SCLT1      | -0,365 | 4,88E-02 | 10,30 | 8,06  | 9,18  | 8,74  |
| SGO1       | -0,365 | 2,94E-02 | 10,21 | 7,94  | 9,42  | 8,92  |
| SMG1P3     | -0,283 | 1,90E-02 | 9,83  | 8,09  | 9,21  | 8,92  |
| BORA       | -0,605 | 1,48E-03 | 9,52  | 6,33  | 8,54  | 7,95  |
| GPD1L      | -0,209 | 4,48E-02 | 9,38  | 8,12  | 9,50  | 8,38  |
| SMG1P1     | -0,304 | 4,00E-02 | 9,06  | 7,37  | 8,81  | 8,74  |
| AC241640.1 | -1,539 | 1,62E-02 | 8,80  | 3,10  | 10,71 | 4,34  |
| ZNF791     | -0,512 | 3,90E-04 | 8,68  | 6,12  | 8,47  | 8,46  |
| PDE3A      | -0,239 | 2,67E-02 | 8,68  | 7,37  | 8,38  | 7,77  |
| HIVEP1     | -0,366 | 1,74E-02 | 8,05  | 6,25  | 7,82  | 7,46  |
| PLAC8      | -0,413 | 2,19E-02 | 7,95  | 5,97  | 7,64  | 5,83  |
| DPP4       | -0,347 | 2,35E-03 | 7,75  | 6,08  | 7,84  | 6,65  |
| CCDC190    | -0,264 | 4,92E-02 | 7,46  | 6,19  | 7,29  | 6,82  |
| IL1R1      | -0,282 | 4,65E-02 | 7,25  | 6,00  | 7,21  | 7,81  |
| KIF14      | -0,564 | 6,99E-03 | 6,75  | 4,64  | 5,68  | 5,25  |
| CXADR      | -0,411 | 5,93E-04 | 6,35  | 4,78  | 5,87  | 5,17  |
| MAP3K5     | -0,280 | 3,78E-02 | 6,08  | 5,00  | 5,82  | 5,62  |
| SYNJ1      | -0,312 | 2,94E-03 | 6,07  | 4,89  | 5,73  | 5,43  |
| TMSB15A    | -0,521 | 1,77E-02 | 5,77  | 4,02  | 5,31  | 4,62  |
| SFRP1      | -0,311 | 1,62E-02 | 5,72  | 4,60  | 5,47  | 5,14  |
| CDK19      | -0,377 | 2,47E-02 | 5,68  | 4,36  | 5,76  | 4,81  |
| ZBTB21     | -0,333 | 4,44E-02 | 5,66  | 4,49  | 5,06  | 4,70  |
| AP000295.1 | -0,791 | 4,42E-02 | 5,60  | 3,52  | 5,37  | 5,08  |
| MAP2K6     | -0,373 | 1,13E-04 | 5,41  | 4,17  | 4,89  | 4,17  |
| SPIN2B     | -0,244 | 4,45E-02 | 5,22  | 4,40  | 5,07  | 4,63  |
| RAB11FIP2  | -0,544 | 9,61E-03 | 5,03  | 3,47  | 4,19  | 4,91  |
| PIF1       | -0,318 | 4,39E-02 | 5,01  | 4,02  | 4,92  | 4,13  |
| MCM9       | -0,297 | 2,33E-02 | 5,00  | 4,07  | 4,95  | 4,26  |
| OCLN       | -0,336 | 2,46E-02 | 4,99  | 3,94  | 5,14  | 4,58  |
| RSC1A1     | -0,388 | 3,96E-02 | 4,95  | 3,84  | 4,36  | 4,90  |
| PIK3CG     | -0,918 | 2,74E-02 | 4,87  | 2,59  | 3,73  | 3,36  |
| KAT2B      | -0,353 | 4,42E-02 | 4,34  | 3,43  | 4,45  | 3,95  |
| ARNTL      | -0,285 | 2,61E-02 | 4,25  | 3,48  | 3,91  | 3,68  |
| ARHGAP11B  | -0,429 | 1,57E-02 | 3,88  | 2,91  | 3,64  | 3,51  |
| ELMOD1     | -0,476 | 6,64E-04 | 3,50  | 2,52  | 3,34  | 2,71  |
| ABCA8      | -0,677 | 2,53E-03 | 3,31  | 2,07  | 3,08  | 2,19  |
| MMP28      | -1,256 | 3,11E-02 | 2,82  | 1,09  | 1,94  | 2,33  |
| MYO5C      | -0,322 | 2,37E-02 | 2,76  | 2,20  | 2,83  | 2,46  |
| AL109918.1 | -0,486 | 4,80E-04 | 2,58  | 1,85  | 2,46  | 2,03  |
| UBN2       | -0,561 | 1,44E-02 | 2,39  | 1,62  | 1,92  | 1,96  |
| AC079594.2 | -0,631 | 1,73E-02 | 2,29  | 1,48  | 1,89  | 2,29  |
| SESN3      | -0,641 | 1,72E-02 | 1,87  | 1,23  | 1,74  | 1,40  |
| SMIM10     | -0,426 | 4,12E-02 | 1,87  | 1,39  | 1,72  | 1,62  |
| NBPF10     | -0,326 | 7,85E-03 | 1,84  | 1,46  | 1,61  | 1,56  |
| AC087632.2 | -1,660 | 3,23E-04 | 1,79  | 0,53  | 1,83  | 1,71  |
| CFAP69     | -0,585 | 1,86E-02 | 1,66  | 1,12  | 1,54  | 1,45  |
| RMDN2      | -0,550 | 1,13E-02 | 1,65  | 1,14  | 1,48  | 1,52  |
| H2AC6      | -0,697 | 6,98E-03 | 1,58  | 0,98  | 1,56  | 1,14  |
| SELP       | -0,676 | 3,81E-02 | 1,48  | 0,93  | 1,36  | 0,99  |

|            |         |          |      |      |      |      |
|------------|---------|----------|------|------|------|------|
| CLDN10     | -0,387  | 3,36E-02 | 1,16 | 0,89 | 1,25 | 0,96 |
| SH3TC2     | -0,555  | 2,35E-02 | 0,92 | 0,62 | 0,84 | 0,67 |
| AMOT       | -0,550  | 2,22E-02 | 0,72 | 0,49 | 0,64 | 0,53 |
| ADAMTS12   | -0,546  | 2,74E-02 | 0,71 | 0,49 | 0,67 | 0,62 |
| CPA4       | -0,847  | 1,94E-02 | 0,66 | 0,37 | 0,50 | 0,41 |
| KCNJ15     | -0,746  | 1,39E-03 | 0,61 | 0,36 | 0,34 | 0,37 |
| WNK3       | -0,654  | 1,77E-02 | 0,60 | 0,38 | 0,54 | 0,48 |
| ADAM32     | -1,239  | 8,91E-03 | 0,58 | 0,23 | 0,47 | 0,32 |
| LPAR1      | -0,631  | 2,38E-02 | 0,52 | 0,34 | 0,55 | 0,37 |
| AC139530.2 | -30,000 | 3,86E-10 | 0,41 | 0,00 | 0,28 | 0,21 |
| H2AC11     | -0,650  | 1,32E-02 | 0,34 | 0,22 | 0,33 | 0,22 |
| SLC26A4    | -0,719  | 3,05E-02 | 0,34 | 0,21 | 0,33 | 0,22 |
| SCUBE3     | -0,411  | 2,69E-02 | 0,25 | 0,19 | 0,26 | 0,20 |
| GP1BB      | -22,691 | 1,38E-06 | 0,23 | 0,00 | 0,34 | 0,21 |
| SPTA1      | -1,154  | 2,10E-02 | 0,17 | 0,08 | 0,11 | 0,10 |
| FBXO15     | -1,172  | 2,43E-02 | 0,16 | 0,07 | 0,14 | 0,11 |
| CMKLR1     | -1,002  | 4,91E-02 | 0,13 | 0,07 | 0,10 | 0,07 |
| DNM1P47    | -0,477  | 2,40E-02 | 0,12 | 0,09 | 0,10 | 0,10 |

**Supplementary Table S9: Genes upregulated by LPS exclusively in cells that express APEX1(1-20).** To identify genes upregulated by LPS specifically in cells expressing moderate levels of APEX1(1-20), but not in cells transduced with the empty virus, the results of the DGE analysis of both cells populations after treatment with detoxified (control) or active LPS (LPS) were combined. The L2FC (Log 2-fold change) states the average difference in gene expression between both treatments, positive values denote upregulation by LPS treatment. Wald test from DESeq2 was used to calculate the significance of the change in the expression. The adjusted p-values take the number of tested genes into account, the threshold for the adjusted p-value was 0.05. Mean expression levels per sample group are stated in transcripts per million (TPM), calculated during quasi-mapping with the tool salmon. The list is sorted by gene expression.

| gene name  | L2FC  | adjusted p-value | mean TPM empty virus con | mean TPM empty virus LPS | mean TPM APEX1(1-20) con | mean TPM APEX1(1-20) LPS |
|------------|-------|------------------|--------------------------|--------------------------|--------------------------|--------------------------|
| IL1RL1     | 0,254 | 4,90E-03         | 186,63                   | 200,07                   | 175,35                   | 209,27                   |
| SELENOT    | 0,254 | 3,59E-03         | 139,92                   | 144,17                   | 139,26                   | 165,99                   |
| PXDN       | 0,668 | 1,34E-08         | 130,73                   | 158,35                   | 107,72                   | 171,11                   |
| YIPF5      | 0,269 | 4,19E-03         | 85,82                    | 92,90                    | 86,53                    | 104,21                   |
| DPYSL3     | 0,257 | 2,43E-02         | 88,43                    | 94,98                    | 83,51                    | 99,79                    |
| NPTN       | 0,193 | 6,51E-03         | 67,85                    | 72,68                    | 67,70                    | 77,38                    |
| COLGALT1   | 0,367 | 8,71E-03         | 55,94                    | 68,32                    | 56,83                    | 73,29                    |
| PLSCR1     | 0,208 | 3,55E-02         | 49,76                    | 53,82                    | 50,49                    | 58,32                    |
| ABI3BP     | 0,365 | 1,22E-02         | 42,83                    | 48,38                    | 48,73                    | 62,49                    |
| CLEC1A     | 0,182 | 4,06E-02         | 49,73                    | 54,56                    | 48,64                    | 55,20                    |
| CD44       | 0,503 | 5,30E-03         | 54,57                    | 62,30                    | 47,62                    | 68,26                    |
| TUSC3      | 0,294 | 6,19E-03         | 41,13                    | 44,21                    | 39,24                    | 48,10                    |
| ANGPT2     | 0,361 | 8,20E-05         | 38,50                    | 43,80                    | 34,41                    | 44,26                    |
| DUXAP9     | 0,284 | 2,13E-02         | 18,14                    | 19,50                    | 18,29                    | 22,28                    |
| NUAK1      | 0,442 | 3,93E-02         | 21,46                    | 20,17                    | 17,49                    | 23,93                    |
| QPCT       | 0,564 | 1,72E-03         | 19,62                    | 20,56                    | 16,30                    | 24,34                    |
| ATAD2      | 0,366 | 2,64E-02         | 14,35                    | 15,01                    | 13,40                    | 17,11                    |
| IFI44      | 0,499 | 1,71E-02         | 12,54                    | 15,99                    | 12,14                    | 17,09                    |
| HPSE       | 0,245 | 6,15E-03         | 10,00                    | 11,08                    | 9,86                     | 11,67                    |
| PRIM1      | 0,506 | 6,36E-04         | 12,13                    | 12,56                    | 9,75                     | 13,82                    |
| AK4        | 0,170 | 2,29E-02         | 9,80                     | 10,28                    | 9,68                     | 10,88                    |
| CHAF1A     | 0,466 | 2,83E-02         | 9,93                     | 11,66                    | 9,48                     | 13,05                    |
| NID2       | 0,901 | 9,23E-06         | 12,01                    | 15,22                    | 8,98                     | 16,73                    |
| LRP12      | 0,252 | 2,81E-02         | 8,67                     | 9,31                     | 8,70                     | 10,36                    |
| RGS2       | 0,398 | 4,63E-02         | 9,44                     | 10,39                    | 8,45                     | 11,13                    |
| ARSK       | 0,211 | 4,04E-02         | 8,45                     | 8,43                     | 8,09                     | 9,35                     |
| GK         | 0,285 | 2,52E-02         | 7,60                     | 8,71                     | 7,35                     | 8,95                     |
| ZFPM2      | 0,369 | 3,39E-02         | 7,57                     | 8,13                     | 6,70                     | 8,72                     |
| IL7R       | 0,419 | 2,96E-04         | 6,01                     | 6,97                     | 5,92                     | 7,92                     |
| CLSPN      | 0,378 | 3,55E-02         | 5,33                     | 6,04                     | 5,66                     | 7,33                     |
| EXO1       | 0,511 | 1,98E-03         | 5,92                     | 6,37                     | 5,28                     | 7,53                     |
| CENPBD1    | 0,199 | 3,14E-02         | 4,71                     | 4,52                     | 4,22                     | 4,85                     |
| CREB5      | 0,326 | 5,89E-04         | 2,77                     | 3,01                     | 2,82                     | 3,52                     |
| PDE1C      | 0,280 | 4,63E-02         | 2,55                     | 3,03                     | 2,57                     | 3,12                     |
| DNAH11     | 0,366 | 3,50E-02         | 2,47                     | 2,47                     | 2,19                     | 2,81                     |
| AUNIP      | 0,412 | 4,00E-02         | 1,93                     | 2,39                     | 1,88                     | 2,50                     |
| ALDH1L2    | 0,311 | 1,70E-02         | 2,04                     | 2,30                     | 1,85                     | 2,29                     |
| LY75-CD302 | 0,547 | 1,38E-02         | 2,12                     | 1,73                     | 1,78                     | 2,57                     |
| CACHD1     | 0,277 | 2,91E-02         | 1,81                     | 2,00                     | 1,76                     | 2,13                     |
| SH3BP1     | 0,715 | 6,40E-03         | 1,32                     | 1,89                     | 1,40                     | 2,31                     |
| CHRNA1     | 0,426 | 1,79E-02         | 1,13                     | 1,44                     | 1,26                     | 1,69                     |
| TUBB2B     | 0,445 | 4,84E-02         | 1,12                     | 1,35                     | 1,08                     | 1,47                     |
| TCF7       | 0,391 | 1,78E-02         | 1,07                     | 1,19                     | 1,05                     | 1,38                     |
| NLRC3      | 0,376 | 1,24E-03         | 0,86                     | 1,03                     | 0,83                     | 1,08                     |
| ARHGEF26   | 0,351 | 4,67E-02         | 0,63                     | 0,64                     | 0,58                     | 0,74                     |

|            |        |          |       |       |      |       |
|------------|--------|----------|-------|-------|------|-------|
| RASGRF2    | 0,347  | 3,88E-02 | 0,57  | 0,71  | 0,56 | 0,71  |
| SLC6A15    | 0,655  | 1,04E-02 | 0,37  | 0,53  | 0,40 | 0,64  |
| AMPD3      | 0,780  | 2,81E-02 | 0,38  | 0,39  | 0,37 | 0,66  |
| SLIT3      | 0,552  | 1,16E-02 | 0,23  | 0,31  | 0,25 | 0,36  |
| AFF3       | 1,033  | 9,24E-03 | 0,30  | 0,35  | 0,23 | 0,46  |
| PRRT2      | 2,229  | 2,83E-02 | 0,18  | 0,23  | 0,17 | 1,00  |
| MYPN       | 0,620  | 2,17E-02 | 0,11  | 0,15  | 0,09 | 0,14  |
| OASL       | 1,044  | 1,05E-02 | 0,07  | 0,09  | 0,08 | 0,17  |
| PAPPA2     | 1,562  | 1,69E-04 | 0,06  | 0,09  | 0,04 | 0,12  |
| PLA2G5     | 1,414  | 2,80E-02 | 0,02  | 0,08  | 0,03 | 0,08  |
| TMEM184A   | 1,991  | 6,69E-04 | 0,04  | 0,05  | 0,02 | 0,06  |
| AC019117.4 | 8,471  | 1,17E-02 | 0,47  | 0,18  | 0,00 | 0,26  |
| CR354443.1 | 32,453 | 1,50E-11 | 0,08  | 0,18  | 0,00 | 0,20  |
| H3P6       | 30,910 | 1,34E-10 | 1,80  | 3,13  | 0,00 | 13,28 |
| SRP9P1     | 25,646 | 5,29E-07 | 20,60 | 15,67 | 0,00 | 8,97  |
| AC244260.1 | 8,622  | 1,48E-02 | 0,10  | 0,20  | 0,00 | 0,21  |

**Supplementary Table S10: Genes downregulated by LPS exclusively in cells that express APEX1(1-20).** To identify genes downregulated by LPS specifically in cells expressing moderate levels of APEX1(1-20), but not in cells transduced with the empty virus, the results of the DGE analysis of both cells populations after treatment with detoxified (con) or active LPS (LPS) were combined. The L2FC (Log 2-fold change) states the average difference in gene expression between both treatments, negative values denote downregulation by LPS treatment. Wald test from DESeq2 was used to calculate the significance of the change in the expression. The adjusted p-values take the number of tested genes into account, the threshold for the adjusted p-value was 0.05. Mean expression levels per sample group are stated in transcripts per million (TPM), calculated during quasi-mapping with the tool salmon. The list is sorted by gene expression.

| gene name | L2FC   | adjusted p-value | mean TPM empty virus con | mean TPM empty virus LPS | mean TPM APEX1(1-20) con | mean TPM APEX1(1-20) LPS |
|-----------|--------|------------------|--------------------------|--------------------------|--------------------------|--------------------------|
| NQO1      | -0,281 | 1,26E-02         | 511,43                   | 442,40                   | 520,05                   | 427,72                   |
| PIR       | -0,566 | 2,25E-02         | 239,69                   | 198,51                   | 259,77                   | 176,08                   |
| IGFBP4    | -0,294 | 1,95E-04         | 187,16                   | 172,64                   | 197,36                   | 160,86                   |
| CLEC14A   | -0,190 | 1,99E-02         | 174,69                   | 168,66                   | 185,74                   | 162,74                   |
| SOX18     | -0,314 | 1,70E-05         | 54,38                    | 50,61                    | 57,60                    | 46,31                    |
| TCN2      | -0,295 | 4,29E-02         | 35,46                    | 32,01                    | 35,93                    | 29,35                    |
| BTG2      | -0,190 | 4,93E-02         | 30,69                    | 28,95                    | 32,58                    | 28,57                    |
| CDC25B    | -0,240 | 3,55E-02         | 28,01                    | 24,68                    | 28,15                    | 23,83                    |
| ATP2B4    | -0,175 | 2,48E-02         | 26,61                    | 24,37                    | 26,48                    | 23,44                    |
| NOS3      | -0,330 | 1,99E-02         | 25,85                    | 21,96                    | 25,64                    | 20,42                    |
| GIMAP8    | -0,227 | 3,68E-02         | 22,98                    | 20,67                    | 24,54                    | 20,96                    |
| GGT5      | -0,353 | 3,66E-03         | 22,00                    | 20,89                    | 24,12                    | 18,92                    |
| SHE       | -0,219 | 3,05E-02         | 22,25                    | 20,13                    | 22,92                    | 19,69                    |
| ENOSF1    | -0,301 | 2,71E-02         | 20,15                    | 17,83                    | 22,46                    | 18,19                    |
| C1orf115  | -0,180 | 3,90E-02         | 20,75                    | 19,57                    | 20,95                    | 18,48                    |
| GJA4      | -0,568 | 1,75E-04         | 14,65                    | 12,07                    | 19,24                    | 12,98                    |
| KLF2      | -0,494 | 4,28E-07         | 13,78                    | 14,54                    | 16,08                    | 11,40                    |
| BTD       | -0,185 | 4,29E-02         | 14,47                    | 12,87                    | 14,48                    | 12,75                    |
| RAMP2     | -0,465 | 4,90E-03         | 11,52                    | 10,04                    | 14,27                    | 10,32                    |
| GIMAP1    | -0,265 | 1,26E-02         | 11,67                    | 11,04                    | 12,66                    | 10,53                    |
| BCAM      | -0,275 | 1,74E-02         | 11,25                    | 10,30                    | 11,90                    | 9,84                     |
| ABCG2     | -0,578 | 1,24E-03         | 9,23                     | 7,10                     | 11,11                    | 7,46                     |
| CYP1A1    | -0,508 | 1,91E-02         | 10,46                    | 8,05                     | 10,60                    | 7,45                     |
| IFT122    | -0,270 | 2,29E-02         | 9,27                     | 8,45                     | 10,30                    | 8,58                     |
| NFIA      | -0,403 | 3,63E-02         | 7,98                     | 7,49                     | 9,43                     | 7,14                     |
| MXD3      | -0,387 | 4,04E-02         | 7,99                     | 6,69                     | 8,09                     | 6,15                     |
| TM7SF2    | -0,335 | 3,14E-02         | 6,80                     | 6,27                     | 6,85                     | 5,42                     |
| ZNF467    | -0,453 | 3,40E-03         | 5,68                     | 4,91                     | 6,20                     | 4,54                     |
| HSPB6     | -0,351 | 2,83E-02         | 4,44                     | 4,25                     | 5,03                     | 3,95                     |
| MRAP2     | -0,384 | 4,81E-03         | 3,70                     | 3,13                     | 4,15                     | 3,17                     |
| ZNF219    | -0,385 | 2,52E-02         | 3,65                     | 2,93                     | 3,90                     | 2,98                     |
| SPACA6    | -0,405 | 9,24E-03         | 3,56                     | 3,10                     | 3,69                     | 2,80                     |
| LRTOMT    | -0,402 | 5,51E-03         | 2,33                     | 2,41                     | 3,68                     | 2,78                     |
| ANKRD44   | -0,767 | 3,45E-02         | 2,23                     | 2,28                     | 3,61                     | 2,12                     |
| GPX3      | -0,573 | 3,61E-03         | 2,36                     | 2,07                     | 3,17                     | 2,13                     |
| ASS1      | -0,446 | 4,39E-03         | 2,43                     | 2,14                     | 2,98                     | 2,19                     |
| GSTM2     | -0,342 | 2,92E-02         | 2,59                     | 2,20                     | 2,86                     | 2,26                     |
| MAP3K14   | -0,384 | 1,70E-02         | 2,62                     | 2,14                     | 2,78                     | 2,13                     |
| NRROS     | -0,303 | 9,64E-04         | 2,48                     | 2,40                     | 2,65                     | 2,15                     |
| STC1      | -0,462 | 2,58E-02         | 2,79                     | 2,23                     | 2,33                     | 1,69                     |
| FAM221A   | -0,310 | 3,55E-02         | 2,04                     | 1,88                     | 2,23                     | 1,80                     |
| CRACR2B   | -0,419 | 1,65E-04         | 1,73                     | 1,72                     | 1,98                     | 1,48                     |
| PARD6A    | -0,362 | 3,74E-02         | 1,79                     | 1,69                     | 1,86                     | 1,44                     |
| SLCO2A1   | -0,674 | 2,74E-02         | 1,48                     | 1,32                     | 1,82                     | 1,15                     |
| LRRC75A   | -0,393 | 1,30E-03         | 1,45                     | 1,25                     | 1,58                     | 1,20                     |

|            |         |          |      |      |      |      |
|------------|---------|----------|------|------|------|------|
| GUCY1A1    | -0,911  | 1,65E-02 | 1,09 | 0,83 | 1,55 | 0,84 |
| SMIM3      | -0,424  | 6,42E-03 | 1,27 | 1,14 | 1,40 | 1,05 |
| NTSR1      | -0,347  | 3,46E-02 | 1,41 | 1,20 | 1,33 | 1,05 |
| C20orf204  | -0,498  | 1,04E-02 | 1,08 | 0,97 | 1,17 | 0,83 |
| TCF15      | -0,467  | 7,58E-03 | 1,05 | 0,97 | 1,13 | 0,82 |
| LHX6       | -0,471  | 1,15E-02 | 1,04 | 0,83 | 1,05 | 0,76 |
| FCF1P2     | -23,428 | 3,30E-11 | 1,19 | 1,42 | 1,05 | 0,00 |
| AP005018.2 | -23,882 | 3,43E-06 | 0,91 | 1,50 | 1,03 | 0,00 |
| CCL23      | -0,826  | 3,88E-02 | 0,99 | 0,74 | 1,02 | 0,57 |
| COL1A2     | -0,415  | 1,87E-03 | 0,77 | 0,64 | 1,01 | 0,76 |
| CASKIN1    | -2,314  | 1,30E-02 | 0,36 | 0,10 | 0,91 | 0,29 |
| WNT9A      | -0,439  | 2,83E-02 | 0,74 | 0,63 | 0,85 | 0,63 |
| MATN2      | -0,529  | 4,63E-02 | 0,58 | 0,43 | 0,76 | 0,53 |
| DLL1       | -0,370  | 2,69E-02 | 0,63 | 0,58 | 0,70 | 0,54 |
| C4B        | -1,377  | 7,99E-03 | 0,51 | 0,53 | 0,67 | 0,25 |
| CD36       | -0,760  | 2,93E-02 | 0,49 | 0,31 | 0,58 | 0,34 |
| EIF3CL     | -0,720  | 9,24E-03 | 0,43 | 0,30 | 0,54 | 0,32 |
| FBLN2      | -0,677  | 1,05E-02 | 0,44 | 0,32 | 0,51 | 0,32 |
| ABCC2      | -0,663  | 1,63E-02 | 0,38 | 0,36 | 0,50 | 0,32 |
| CA4        | -1,172  | 1,37E-02 | 0,28 | 0,19 | 0,41 | 0,19 |
| EGLN3      | -1,171  | 1,62E-03 | 0,31 | 0,25 | 0,38 | 0,17 |
| ARL14EPL   | -0,995  | 4,63E-02 | 0,29 | 0,23 | 0,38 | 0,19 |
| CDH4       | -0,476  | 1,48E-02 | 0,33 | 0,26 | 0,37 | 0,26 |
| INHBB      | -0,814  | 1,69E-04 | 0,22 | 0,18 | 0,30 | 0,17 |
| CLEC3B     | -1,195  | 2,74E-02 | 0,17 | 0,11 | 0,28 | 0,12 |
| AC005520.3 | -1,051  | 5,63E-03 | 0,25 | 0,19 | 0,26 | 0,14 |
| KCNN4      | -0,792  | 3,04E-02 | 0,20 | 0,17 | 0,24 | 0,14 |
| ABLIM2     | -1,741  | 7,58E-03 | 0,17 | 0,13 | 0,24 | 0,07 |
| CAMSAP3    | -0,935  | 1,63E-02 | 0,07 | 0,08 | 0,17 | 0,09 |
| SYT7       | -0,953  | 3,29E-02 | 0,15 | 0,10 | 0,16 | 0,08 |
| TBC1D3K    | -30,254 | 2,79E-10 | 0,06 | 0,08 | 0,08 | 0,00 |
| RASSF10    | -1,470  | 2,80E-02 | 0,03 | 0,02 | 0,06 | 0,02 |
| SCNN1B     | -2,117  | 1,78E-02 | 0,04 | 0,03 | 0,04 | 0,01 |
| ADAMTS15   | -1,383  | 1,02E-03 | 0,03 | 0,02 | 0,04 | 0,02 |
| NOS1       | -2,260  | 2,64E-02 | 0,00 | 0,00 | 0,02 | 0,00 |
| RTN4RL1    | -2,401  | 3,55E-02 | 0,01 | 0,01 | 0,01 | 0,00 |
